# Supplementary material
Source: PubMed Central journal article supplement (PMC4246259)
Supplement: pnas.1411077111.sapp.pdf [file pnas.1411077111.sapp.pdf]

1 **Supporting Information**

2

3 **Metabolic sensor governing bacterial virulence in *Staphylococcus aureus***

4

5 Yue Ding<sup>a</sup>, Xing Liu<sup>b</sup>, Feifei Chen<sup>a</sup>, Hongxia Di<sup>a</sup>, Bin Xu<sup>a</sup>, Lu Zhou<sup>c</sup>, Xin Deng<sup>d,e</sup>,  
6 Min Wu<sup>f</sup>, Cai-Guang Yang<sup>b,1</sup>, Lefu Lan<sup>a,1</sup>

7

8 <sup>a</sup>Department of Molecular Pharmacology, Shanghai Institute of Materia Medica,  
9 Chinese Academy of Sciences, Shanghai 201203, China;

10 <sup>b</sup>CAS Key Laboratory of Receptor Research, Shanghai Institute of Materia Medica,  
11 Chinese Academy of Sciences, Shanghai 201203, China;

12 <sup>c</sup>Department of Medicinal Chemistry, School of Pharmacy, Fudan University,  
13 Shanghai 201203, China;

14 <sup>d</sup>Department of Chemistry and <sup>e</sup>Institute for Biophysical Dynamics, The University of  
15 Chicago, Chicago, Illinois 60637, USA;

16 <sup>f</sup>Department of Basic Sciences, University of North Dakota School of Medicine and  
17 Health Sciences, Grand Forks, ND 58203, USA.

18 The authors declare no conflict of interest.

19 <sup>1</sup>To whom correspondence should be addressed:

20 Shanghai Institute of Materia Medica, Chinese Academy of Sciences, Shanghai  
21 201203, China. Phone: 021-50803109; Fax: 021-50807088; Email:  
22 yangcg@simm.ac.cn (C.-G.Y.) or llan@mail.shcnc.ac.cn (L.L.)

23 **Running Title: CcpE links TCA-cycle activity with virulence**

24

25 **Experimental Procedures**

26 **Construction of *S. aureus*  $\Delta$ *ccpE* Strain,  $\Delta$ *citB* Strain, and  $\Delta$ *ccpE* $\Delta$ *citB* Double**

27 **Mutant Strain.** The gene replacement vector pKOR1 (1) was used to construct a

28 *ccpE* (*NWMN\_0641*) null mutant strain ( $\Delta$ *ccpE*) as described in our previous studies

29 (2, 3). Briefly, PCRs were performed in order to amplify sequences upstream (ca. 1.55

30 kb) and downstream (ca. 2.0 kb) of the intended deletion. The upstream fragment was

31 amplified from *S. aureus* strain Newman genomic DNA using primers *ccpE*-up-F

32 (with *Bam*HI site) and *ccpE*-up-R (with *Hind*III site) (Table S2), and the downstream

33 fragment was amplified with primers *ccpE*-down-F (with *Hind*III site) and

34 *ccpE*-down-R (with *Xho*I site) (Table S2). A ca.1.3 kb erythromycin resistance

35 cassette (covering 465 bp of the *ermB* upstream region, the 738bp *ermB* gene, and 60

36 bp downstream of *ermB* gene) was amplified from plasmid pAT18 (4) with primers

37 *erm*-F and *erm*-R (both with *Hind*III site) (Table S2) for replacing the *ccpE* gene in

38 the *S. aureus* Newman strain. The three PCR products were digested with *Hind*III,

39 mixed together and ligated by T4 DNA ligase (New England Biolabs). The ligation

40 product was amplified with primers *ccpE*-BP-F and *ccpE*-BP-R (Table S2). Next, the

41 PCR product was used for recombination with pKOR1, and the product was

42 introduced to *E. coli* DH5 $\alpha$ . The construct was sequenced to ensure that no unwanted

43 mutations resulted. The resulting plasmid, pKOR1::*ccpE*, was transferred by

44 electroporation to *S. aureus* RN4220, and subsequently into *S. aureus* Newman. The

45 allelic replacement was performed as described previously and PCR and DNA

46 sequencing further confirmed the deletion of *ccpE*.

47 To construct a *citB* (*NWMN\_1263*) null mutant strain, PCRs were performed in  
48 order to amplify sequences upstream (ca. 1.95 kb) and downstream (ca. 2.0 kb) of the  
49 intended deletion. The upstream fragment was amplified from *S. aureus* strain  
50 Newman genomic DNA using primers *citB*-up-F (with *NdeI* site) and *citB*-up-R (with  
51 *BamHI* site) (Table S2), and the upstream fragment was amplified with primers  
52 *citB*-down-F (with *BamHI* site) and *citB*-down-R (with *XhoI* site) (Table S2). The two  
53 fragments were digested with *BamHI* and ligated. The ligation product was then PCR  
54 amplified with primers *citB*-BP-F and *citB*-BP-F (Table S2), and subsequently  
55 recombined into pKOR1 to generate pKOR1:: $\Delta$ *citB*. The  $\Delta$ *citB* mutant was  
56 constructed according to a similar strategy as described above.

57 The  $\Delta$ *ccpE* $\Delta$ *citB* double mutant strain (Table S1) was generated by  $\Phi$ 85 phage  
58 transduction (2, 5) of the *ccpE*::*ermB* allele from Newman *ccpE* strain (Table S1)  
59 into the  $\Delta$ *citB* background (Table S1). Strain inactivated for *ccpE* in JE2 was  
60 generated by transduction of the *ccpE*::*ermB* allele from Newman *ccpE* using  
61 bacteriophage  $\Phi$ 85. All mutant alleles were verified by DNA sequencing.

62

63 **Construction of Plasmids for Constitutive Expression of *ccpE*, *ccpE*<sub>R145A</sub>,**  
64 ***ccpE*<sub>R256A</sub>, and *citB*.** To construct plasmids for constitutive expression of *ccpE*,  
65 *ccpE*<sub>R145A</sub>, *ccpE*<sub>R256A</sub>, and *citB*, shuttle plasmid pYJ335 (6) was used as described in  
66 our previous studies (2, 3, 5). To express *ccpE* constitutively, a ca. 0.9 kb DNA  
67 fragment containing *ccpE* was amplified from *S. aureus* Newman genomic DNA with  
68 primers *ccpE*-F and *ccpE*-R (Table S2) and then cloned into pYJ335, where the *ccpE*

69 gene was downstream of the tetracycline-inducible *xyl/tetO* promoter, yielding  
70 plasmid p-*ccpE* (Table S1). In order to express *ccpE* in the  $\Delta$ *ccpE* strain (with an  
71 erythromycin resistance marker) that harbors the derivatives of pCL-lacZ (with a  
72 chloroamphenicol resistance marker), plasmid pT-*ccpE* was constructed. Briefly, ca.  
73 0.9 kb DNA fragment containing *ccpE* was amplified from *S. aureus* Newman  
74 genomic DNA with primers *ccpE*-F and *ccpE*-R-tet (with *EcoRI* site) (Table S2), and  
75 a 1.6 kb tetracycline resistance cassette was amplified from plasmid pT181 (7) with  
76 primers tet-F (with *EcoRI* site) and tet-R (Table S2). These two PCR products were  
77 digested with *EcoRI*, mixed together, and ligated by T4 DNA ligase. The ligation  
78 product was amplified with primers *ccpE*-F and tet-R and then cloned into pYJ335,  
79 where the *ccpE* gene was downstream of the tetracycline-inducible *xyl/tetO* promoter,  
80 yielding plasmid pT-*ccpE* (Table S1). Plasmid pYJ335-Tc (Table S1) was constructed  
81 by cloning the tetracycline resistance cassette (amplified from plasmid pT181 with  
82 primers tet-F and tet-R) into pYJ335 and this plasmid was used as the control plasmid  
83 where appropriate.

84 Two mutations, pT-*CcpE*<sub>R145A</sub> and pT-*CcpE*<sub>R256A</sub> (Table S1), were constructed  
85 using a QuikChange II site-directed mutagenesis kit (Stratagene) with primer pairs  
86 R145AF/R145AR and R256AF/R256AR, respectively. To express *citB*, a ca. 2,8 kb  
87 DNA fragment (covering 108 bp upstream and 52 bp downstream of *citB* gene) was  
88 generated from *S. aureus* Newman genomic DNA with primers *citB*-F and *citB*-R  
89 (Table S2) and then cloned into pYJ335 in the same orientation as the  
90 tetracycline-inducible *xyl/tetO* promoter, yielding plasmid p-*citB* (Table S1). All of the

91 constructs were sequenced to ensure that no unwanted mutations were introduced.

92

93 **Construction of *citB-lacZ*, *citB-M-lacZ*, *cap-lacZ*, *SAV1168-lacZ*,**  
94 ***SAV1168-M-lacZ*, and *crtO-lacZ* transcriptional fusions.** The plasmid pCL-LacZ  
95 carrying a promoterless *lacZ* reporter gene cluster was used to construct  
96 promoter-*lacZ* reporter fusions as described previously (8). For *citB-lacZ*, the *citB*  
97 promoter region (-767 to +78 of the start codon) was amplified by PCR using the  
98 primers lacZ1350-F (with *EcoRI* site) and lacZ1350-R (with *KpnI* site) (Table S2). To  
99 generate *citB-M-lacZ* (ATAAGTTTTGCTTAT was mutated to  
100 **CGCCACTTTGCTTAT**), a QuikChange II site-directed mutagenesis kit (Stratagene)  
101 and primer pair citB-M-F/citB-M-R (Table S2) were used. For *cap-lacZ*, the *cap*  
102 promoter region (-406 to +178 of the start codon) was amplified by PCR using the  
103 primers lacZ0149-F (with *EcoRI* site) and lacZ0149-R (with *KpnI* site) (Table S2).  
104 For *SAV1168-lacZ*, the *SAV1168* promoter region (-511 to +158 of the start codon)  
105 was amplified by PCR using the primers lacZ1168-F (with *EcoRI* site) and  
106 lacZ1168-R (with *KpnI* site) (Table S2). To generate *SAV1168-M-lacZ*  
107 (ATGATAAGTTTTGCTTAAATA was mutated to ATGATAAGTTTTATGGCCATA),  
108 a QuikChange II site-directed mutagenesis kit (Stratagene) and primer pair 1168M1F  
109 /1168M1R (Table S2) were used. For *crtO-lacZ*, the *crtO* promoter region (-766 to  
110 +10 of the start codon) was amplified by PCR using the primers lacZ-crtO-F (with  
111 *EcoRI* site) and lacZ-crtO-R (with *KpnI* site) (Table S2). All promoter DNA fragments  
112 were amplified from *S. aureus* Newman genomic DNA. The cloned promoter

113 sequences were confirmed by DNA sequencing. The constructs were electroporated  
114 into RN4220 and then transformed into Newman and its derivatives using  
115 bacteriophage Ø85, as indicated.

116

117 **β-Galactosidase assays.** Briefly, overnight cultures of the indicated strains were  
118 washed twice and diluted 100-fold in fresh TSB medium. The liquid cultures were  
119 grown in a 20-ml tube with a tube volume-to-medium volume ratio of 5:1, shaking  
120 with 250 rpm at 37 °C, and sampled at time points thereafter. β-Galactosidase activity  
121 was assayed as previously described (9) using 4-methylumbelliferyl-β-d-galactoside  
122 (4MUG) as the enzymatic substrate. The product (7-hydroxy-4-methylcoumarin,  
123 4MU) was detected using a 2104 EnVision® Multilabel Plate Readers or Synergy 2  
124 (Biotek) following the manufacturer's instructions. The reaction was monitored at 460  
125 nm with an excitation wavelength of 365 nm. Each sample was tested in triplicate.  
126 Relative LacZ activity was normalized by cell density at 600 nm.

127

128 **Protein Expression and Purification.** The *ccpE* gene was amplified using genomic  
129 DNA from *S. aureus* Newman as a template with primers ccpE-PF (with *Bam*HI site)  
130 and ccpE-PR (with *Xho*I site) (Table S2). The amplified fragment was digested with  
131 *Bam*HI and *Xho*I and inserted into pET28a digested with the same pair of restriction  
132 enzymes in order to generate pET28a::*ccpE* (Table S1). Two mutations,  
133 pET28a::*CcpE*<sub>R145A</sub> and pET28a::*CcpE*<sub>R256A</sub> (Table S1), were constructed using a  
134 QuikChange II site-directed mutagenesis kit (Stratagene) with primer pairs

135 R145AF/R145AR and R256AF/R256AR (Table S2), respectively.

136 The proteins were expressed in *E. coli* strain BL21 star (DE3) and purifications  
137 were performed as described in our previous studies (2, 3, 9). Briefly, the *E. coli* strain  
138 was sub-cultured into 200 ml of LB broth (with appropriate antibiotics) to obtain an  
139 optical density at 600 nm (OD<sub>600</sub>) of approximately 0.1 and grown to an OD<sub>600</sub> of  
140 ~0.6. Expression of CcpE was induced with 1 mM isopropyl- $\beta$ -D-thiogalactoside  
141 (IPTG) overnight at 16 °C with shaking (250 rpm). Cells were harvested, and the  
142 pellets were suspended in 4 ml of buffer A (20 mM Tris-HCl, pH 8.0, 500 mM NaCl,  
143 20 mM EDTA, 1 mM DTT), and lysed at 4 °C by sonication. The lysate was  
144 centrifuged at 15,000 *g* for 30 min, and the supernatants were loaded onto a  
145 nickel-nitrilotriacetic acid column (His Trap; GE Healthcare). After being equilibrated  
146 with buffer A, 6His-CcpE was eluted with a 0-100% gradient of buffer B (20 mM  
147 Tris-HCl, pH 8.0; 500 mM NaCl, 1 mM DTT, 500 mM Imidazole). The purified  
148 protein was verified by SDS-PAGE followed by Coomassie blue staining. A similar  
149 strategy was used for protein expression and purification of 6His-CcpE<sub>R145A</sub> and  
150 6His-CcpE<sub>R256A</sub>.

151 The proteins were finally purified and their oligomerization states were estimated  
152 by size-exclusion chromatography using a calibrated HiLoad 16/600 Superdex 200 pg  
153 (GE Healthcare, 28-9893-35) pre-equilibrated with buffer C (20 mM Tris-HCl, pH 8.0,  
154 500 mM NaCl, and 1 mM DTT). The column was calibrated using gel-filtration  
155 calibration kits (28-4038-42) from GE Healthcare and the results were analyzed  
156 according to the manual using Microsoft Excel. Sample fractions were analyzed for

157 purity by SDS-PAGE and pure fractions were pooled and concentrated. Blue Dextran  
158 2000 was used to calculate the void volume of the column.

159

160 **Fluorescence-based Thermal Shift (FTS) assay.** FTS assays were performed as  
161 described in our previous study (10) with some modifications. Purified 6His-CcpE  
162 was appropriately diluted in a buffer containing 20 mM Tris-HCl, pH 8.0, 500 mM  
163 NaCl, and 1 mM DTT. All assay experiments used 4 µg proteins per well and 5 nl  
164 5000× Sypro Orange (Invitrogen) up to a total volume of 20 µl. 96-well PCR plates  
165 were sealed with optical seal, shaken, and centrifuged after the protein and the  
166 compounds were added. Thermal scanning (25 to 95 °C at 1 °C/min) was performed  
167 using a Fast 7500 Real-Time PCR System (Applied Biosystems) and fluorescence  
168 intensity was measured after every 20 seconds. Curve fitting, melting temperature  
169 calculation, and report generation on the raw FTS data were performed using Protein  
170 thermal shift software (Applied Biosystems). All experiments were performed in  
171 triplicate. Data analysis was analyzed with Origin software. Pre-melt (initial) and  
172 post-melt (final) fluorescence signals of all samples have been normalized to relative  
173 values of 0% and 100%, respectively.

174

175 **Electrophoretic Mobility Shift Assay (EMSA).** The electrophoretic mobility shift  
176 assays (EMSA) were performed as described in our previous studies (2, 3, 9) with  
177 some modifications. Briefly, a mixture of the DNA probe, control DNA fragments,  
178 purified proteins, and binding buffer A (20mM Tris-HCl, pH 7.4; 50 mM KCl, 20 mM



179 MgCl<sub>2</sub>, 1 mM EDTA, 5% Nonidet® P-40, and 5% Glycerol) were incubated on ice  
180 for 30 min. Reaction mixtures were loaded onto a 4.5% nondenaturing  
181 polyacrylamide gel in 0.5×TBS buffer (50 mM Tris, 41.5 mM borate, pH 8.0). The  
182 gels were run at 300V for 5 min and at 80V at 4 °C for the remaining time. The gel  
183 was stained in GelRed nucleic acid staining solution (Biotium, 41003) for 10 min, and  
184 then the DNA bands were visualized by gel exposure to 260-nm UV light using  
185 Tanon-5200 multi. To evaluate the effect of sodium citrate (Sigma-Aldrich, W302600)  
186 and sodium isocitrate (Sigma-Aldrich, I1252) on the protein-DNA interaction, either  
187 sodium citrate or sodium isocitrate was added to the binding reaction buffer at a final  
188 concentration of 10 mM. The electrophoretic mobility shift experiments were also  
189 performed in a similar strategy with a binding buffer B consisting of 10mM Tris-HCl  
190 (pH 7.5), 50 mM NaCl, 1mM EDTA, 1mM DTT, and 5% Glycerol. This binding  
191 buffer is similar to the buffer that was used in a recent study for EMSA to evaluate the  
192 CcpE-protein interactions. Images were taken using Tanon-5200 multi.

193 DNA probes were PCR-amplified from *S. aureus* Newman genomic DNA using  
194 the primers listed in Table S6. The probes for the *citB* (*SAV1350*) promoter, a 282 bp  
195 DNA fragment (*citB-L-p*) covering the promoter regions of *citB* (from -194 to +88 of  
196 the start codon which contains protected region I but not protected region II) was  
197 amplified with primers citB-p-F and citB-p-R (Table S2). The *citB* promoter DNA  
198 *citB-p12* fragment (from -321 to +66 of the start codon, covering both protected  
199 regions I and II) was amplified with primers citB-12F and citB-12F (Table S2). For  
200 *cap5A* (*SAV0149*) promoter, a ca. 0.37 kb DNA fragment (*cap5A-p*) covering the

201 promoter regions of *cap5A* (from -211 to +163 of the start codon) was amplified  
202 using primers cap-p-F and cap-p-R (Table S2). For *SAV1168* promoter, a ca. 0.38 kb  
203 DNA fragment (*SAV1168-p*) covering the promoter regions of *SAV1168* (from -150  
204 to +158 of the start codon) was amplified using primers SAV1168-p-F and  
205 SAV1168-p-R. The PCR products were purified with DNA products purification kit  
206 (Omega, D6492-02).

207 To test the role of the Box I-like sequences (ATAA-N<sub>7</sub>-TTAT, where N is any  
208 nucleotide) in the interaction between *citB* promoter DNA and CcpE, a ca. 0.24 kb  
209 DNA fragment (*citB-p*) covering the promoter region of *citB* (from -151 to +88 of the  
210 start codon) was amplified from *S. aureus* Newman genomic DNA with primers  
211 citB-pB-F and citB-p-R (Table S2) while a ca. 0.24 kb mutated DNA fragment  
212 (*citB-M-p*, ATAAGTTTTGCTTAT was mutated to CGCCACTTTGCTTAT) was  
213 amplified with primers citB-pM-F and citB-p-R (Table S2).

214 Additionally, DNA fragments, including *ccpE-O* (from +94 to +532 of the start  
215 codon of *ccpE*) and *citB-U* (from -128 to +88 of the start codon of *citB*), were used as  
216 a negative control where appropriate. For *ccpE-O*, primers ccpE-cF and ccpE-cR  
217 (Table S2) were used. For *citB-U*, primers citB-pc-F and citB-p-R (Table S2) were  
218 used.

219

220 **Dye Primer-based DNase I Footprinting Assay.** The published DNase I footprint  
221 protocol (11) was modified in a similar way as described in our previous study (3, 9,  
222 12). Briefly, PCR was used to generate DNA fragments using the primer sets as

223 detailed in Table S2. For amplification of *citB* promoter, a ca. 0.85 kb DNA fragment  
224 (from -766 to +88 of the start codon of *citB*) was generated by PCR using primers  
225 1350FAM and lacZ1350-F. For amplification of the *SAV1168* promoter, a ca. 0.67 kb  
226 DNA fragment (from -511 to +158 of the start codon of *SAV1168*) was generated by  
227 PCR with primer 1168FAM and lacZ1168-F. All PCR products were purified with a  
228 DNA products purification kit (Omega, D6492-02). 50 nM 6-carboxyfluorescein  
229 (6-FAM)-labeled promoter DNA and 2  $\mu$ M 6His-CcpE in 50  $\mu$ l of binding buffer (20  
230 mM Tris-HCl, pH 7.4; 50 mM KCl, 20 mM MgCl<sub>2</sub>, 1 mM EDTA, and 5% Nonidet®  
231 P-40, 1 mM DTT) were incubated on ice for 30 min. Then 0.01 unit of DNase I was  
232 added to the reaction mixture and incubated for 5 more min. The digestion was  
233 terminated by adding 90  $\mu$ l of quenching solution (200 mM NaCl, 30 mM EDTA, 1%  
234 SDS), and then the mixture was extracted with 200  $\mu$ l of phenol-chloroform-isoamyl  
235 alcohol (25:24:1). The digested DNA fragments were isolated by ethanol precipitation.  
236 5.0  $\mu$ l of digested DNA was mixed with 4.9  $\mu$ l of HiDi formamide and 0.1  $\mu$ l of  
237 GeneScan-500 LIZ size standards (Applied Biosystems). A 3730XL DNA analyzer  
238 detected the sample, and the result was analyzed with GeneMapper software. The dye  
239 primer-based sequencing kit (Thermo, 79260) was used in order to more precisely  
240 determine the sequences after the capillary electrophoresis results of the reactions  
241 were aligned. Electrophoregrams were then analyzed with GeneMarker v1.8 (Applied  
242 Biosystems).

243

244 **Measurement of Intracellular Citrate Concentration.** Overnight cultures of the

245 indicated *S. aureus* strains were washed twice and diluted 100-fold in fresh TSB  
246 medium without glucose. The liquid cultures were grown in a 50-ml tube with a  
247 volume-to-medium volume ratio of 5:1, shaken at 250 rpm at 37 °C for 6 h (OD<sub>600</sub> ≈  
248 5.0), of aeration. After collection of the cells by centrifugation, the pellet was washed  
249 with 20 mM Tris-HCl (pH 8.0) containing 1 mM EDTA, and resuspended in 0.01 M  
250 PBS buffer (137 mM NaCl, 2.7 mM KCl, 4.3 mM Na<sub>2</sub>HPO<sub>4</sub>, 1.4 mM KH<sub>2</sub>PO<sub>4</sub>;  
251 pH=7.4). This mixture was subjected to homogenizer lysis (FastPrep FP2400,  
252 QBiogene, USA; 3 cycles each of 40 s at 6.5 m/s). After cell disruption, the cell debris  
253 and glass beads were separated by centrifugation (5 min at 14,000 rpm). The  
254 concentration of citrate in the supernatant fluid was determined using a Citrate Assay  
255 Kit (Biovision, #K655-100). Intracellular citrate concentration was estimated  
256 according to the assumptions that the *S. aureus* cell volume is  $5 \times 10^{-13}$  ml (13) and  
257 that 1 A<sub>600</sub> corresponds to  $2 \times 10^8$  cells/ml (14).

258

259 **Measurement of Staphyloxanthin Production.** Colonies of *S. aureus* were  
260 cultivated on TSA plate (without glucose) at 37 °C for 48 hours. Bacteria were washed  
261 from the TSA plate and subjected to methanol extraction (5). The optical density at  
262 465 nm (OD<sub>465</sub>) was measured and normalized to the optical density (OD<sub>600</sub>) of the  
263 washed bacterial suspensions.

264

265 **Siderophore Detection Assays.** *S. aureus* cultures were pregrown overnight in  
266 Roswell Park Memorial Institute 1640 (RPMI) medium (Life Technologies,

267 #31800-022), and  $1 \times 10^7$  CFU of each strain was inoculated into fresh RPMI medium.  
268 The liquid cultures were grown in a 20-ml tube with a tube volume-to-medium  
269 volume ratio of 5:1 at 37 °C with shaking for 24 hours ( $OD_{600} \approx 2.0$ ), 250 rpm of  
270 aeration.

271 Siderophore plate bioassays were performed as previously described using a  
272 chrome azurol S agar diffusion (CASAD) assay (15) with some modifications. Holes  
273 with 5-mm-diameter were punched on the CAS agar plate. Each hole was filled with  
274 35  $\mu$ l of spent culture supernatants, and the plate was incubated at 37 °C for 4-8 h. The  
275 orange halos that formed around the wells correspond to the iron-chelating activity of  
276 the siderophores.

277 To quantify the siderophore activity in spent culture supernatants, chrom azurol S  
278 (CAS) shuttle solution was used as previously described (9). Briefly, a 10-fold  
279 dilution of culture supernatants was mixed with equal volumes of CAS shuttle  
280 solution and incubated in darkness at room temperature for 45 mins. Absorption at  
281 630 nm was measured using a Synergy 2 (Biotek). Siderophore units were calculated  
282 as follows:  $(A_{630} \text{ of sterile culture medium} - A_{630} \text{ of samples}) / A_{630} \text{ of sterile culture}$   
283  $\text{medium}$ . Ultimately, siderophore units were normalized to a culture  $OD_{600}$  of 1.0.

284

285 **Growth of *S. aureus* under Iron-limited Conditions.** *S. aureus* cultures were  
286 pregrown overnight in Roswell Park Memorial Institute 1640 (RPMI) medium. The  
287 cells were washed thrice with Chelex-treated RPMI medium (iron-limited medium)  
288 (16) and each strain was inoculated into Chelex-treated RPMI medium ( $1 \times 10^7$

289 CFU/ml) with or without FeCl<sub>3</sub> (50 μM). The liquid cultures were grown in a 20-ml  
290 tube with a tube volume-to-medium volume ratio of 5:1 and shaken with 250 rpm of  
291 aeration at 37 °C. Bacterial growth was monitored using a nanodrop to measure  
292 absorption at 600 nm every 3 hours for 12 hours.

293 Growth of *S. aureus* under iron-limited conditions was also carried out on a  
294 96-well plate (nunc; no. 167008). Briefly, *S. aureus* cultures were pregrown overnight  
295 in RPMI. The cells were washed thrice with Chelex-treated RPMI medium. A 20-μl  
296 volume of the sample containing 1×10<sup>8</sup> CFU of *S. aureus* bacteria was added to the  
297 wells with 180 μl Chelex-treated RPMI medium, and a 70-μl volume of  
298 filter-sterilized mineral oil was added in order to prevent evaporation during the assay.  
299 The plate was cultivated at 37 °C and absorption at 600 nm was measured every hour  
300 for 24 hours using a Synergy 2 (Biotek).

301

302 **Determination of Intracellular Iron Content.** *S. aureus* cultures were pregrown  
303 overnight in RPMI medium. The cells were washed thrice with RPMI and diluted into  
304 fresh RPMI medium, yielding 1×10<sup>7</sup> CFU/ml cultures. The liquid cultures (50 ml)  
305 were grown in 250-ml flask at 37 °C for 24 h with shaking, 250 rpm of aeration.  
306 Subsequently, the cultures were centrifuged and the cells were collected. The cell  
307 pellet was prepared and run on atomic absorption spectroscopy in order to determine  
308 intracellular iron content using PerkinElmer AA800. Final Fe concentration was  
309 displayed as a percentage on the basis of dry weight.

310

311 **Measuring Transferrin-Fe Release.** Overnight *S. aureus* cultures were diluted  
312 100-fold in fresh TSB medium without glucose. The liquid cultures were grown in a  
313 20-ml tube with a tube volume-to-medium volume ratio of 5:1, shaken at 250 rpm at  
314 37 °C for 15 h. Cultures were centrifuged and supernatants were collected.  
315 Measurement of the release of iron from transferrin was performed as previously  
316 described (17). Iron-bound transferrin displays an absorption peak at 470 nm. When  
317 iron dissociates from transferrin, the intensity of the peak at 470 nm absorption  
318 decreases. Absorption at 470 nm was measured every 1 min for 30 min upon  
319 introduction of the samples. Transferrin stock solutions of 400 µM were prepared by  
320 suspending human transferrin (Sigma, T8158-100) in distilled water and a final  
321 concentration of transferrin at 40 µM was used for all samples. All absorption  
322 readings were measured using Synergy 2 (Biotek).

323

324 **Analyses of Gene Expressions with Oligonucleotide Microarray.** Overnight  
325 cultures of *S. aureus* Newman and its derivatives were washed and diluted 100-fold in  
326 fresh TSB medium (without glucose) in a 20-ml tube with a tube volume-to-medium  
327 volume ratio of 5:1. The liquid culture was grown at 37 °C for about 6 h ( $OD_{600} \approx 5.0$ )  
328 with shaking, 250 rpm of aeration. Total RNA was immediately stabilized with  
329 RNeasy Protect Bacteria Reagent (Qiagen, Valencia, CA) and then extracted through the  
330 use of a Qiagen RNeasy kit following the manufacturer's instructions. The total  
331 DNase-treated RNA samples were then analyzed by CapitalBio Corp  
332 (<http://www.capitalbio.com/index.asp>, Beijing, China) for Chip (Affymetrix) assay.

333 Briefly, samples were labeled according to the manufacturer (Affymetrix, Santa Clara,  
334 CA) and then hybridized to the Affymetrix GeneChip *S. aureus* genome array  
335 (Affymetrix, Cat. no. 900514) for 16 h at 50 °C through the use of the GeneChip  
336 hybridization oven at 60 rpm. Washing, staining, and scanning were performed using  
337 the Affymetrix GeneChip system. The data were normalized using Robust Multi-array  
338 Average (RMA) (18). Gene expression analysis was performed using three  
339 independent mRNA samples for each strain. Microarray data were analyzed with  
340 SAM (Significance Analysis of Microarrays) software (19). Criterion such as cutoff  
341 limitation for fold change  $\geq 2$  or  $\leq 0.5$  and q-value  $\leq 5\%$  was used in order to select  
342 differential expression genes. All data were submitted to the NCBI GEO database  
343 under accession number GSE57260.

344

345 **Quantitative Real-time PCR.** The bacterial growth and the preparation of total  
346 DNase-treated RNA were performed as described above. The total RNA (5  $\mu$ g) was  
347 reversely transcribed to synthesize cDNA using the PrimeScript RT reagent Kit  
348 (Takara) with random primers. The resulting cDNA were diluted by 1:2, 1:4, and 1:8,  
349 respectively. Triplicate quantitative assays were performed on 1  $\mu$ l of each cDNA  
350 dilution with the THUNDERBIRD™ SYBR® qPCR Mix and 300 nM primers using  
351 an Applied Biosystems 7500 Fast Real-Time PCR System. Dissociation curve  
352 analysis was performed in order to verify product homogeneity. The primers used for  
353 Quantitative real-time PCR for *SAV1813*, *SAV1609*, *SAV1168*, *SAV1064*, *SAV1048*,



354 *SAV0812*, *SAV0423*, *SAV0149*, *SACOL0209*, and *SAV0114* (*sirB*) are listed in Table  
355 S2.

356 To measure the relative expression of *sirABC* operon when bacteria were grown  
357 in RPMI medium, *sirB* gene-specific primers were used (Table S2). *S. aureus* cultures  
358 were pregrown overnight in RPMI. The cells were washed with RPMI three times,  
359 and  $1 \times 10^7$  CFU of each strain was inoculated into fresh RPMI medium. Liquid  
360 cultures were grown in 20-ml tube with a tube volume-to-medium volume ratio of 5:1  
361 at 37 °C for 24 h ( $OD_{600} \approx 2.0$ ) with shaking, 250 rpm of aeration. Total RNA was  
362 immediately stabilized with RNAprotect Bacteria Reagent (Qiagen, Valencia, CA)  
363 and then through the use of a Qiagen RNeasy kit following the manufacturer's  
364 instructions.

365 The amplicon of 16S rRNA was used as an internal control (20-22) in order to  
366 normalize all data. The relative quantification method ( $\Delta\Delta CT$ ) as previously  
367 described was used in order to calculate relative expression levels of interest genes  
368 (23, 24).

369

### 370 **Construction, Expression, and Purification of the Inducer-binding Domain of**

371 **CcpE<sub>IBD</sub>**. The *ccpE<sub>IBD</sub>* was amplified from *S. aureus* Newman genomic DNA with  
372 primers *ccpE<sub>IBD</sub>-F* and *ccpE<sub>IBD</sub>-R* (Table S2). The PCR product was digested with  
373 *EcoRI* and *XhoI*, and inserted into similarly cut pET28b (Novagen) in order to  
374 produce the plasmids pET28b-*ccpE<sub>IBD</sub>*. DNA sequencing was used to verify the

375 clones, which were transformed into *E. coli* BL21 (DE3) for expression. The  
376 expression cells were grown in LB to OD<sub>600</sub> 0.6~0.8; 0.5 mM of isopropyl  
377 β-D-1-thiogalactopyranoside (IPTG) was then added. After incubation at 16 °C for  
378 14~16 h, the culture was harvested, and cell pellets were resuspended in buffer A (20  
379 mM Tris-HCl, pH 8.0; 500 mM NaCl, 0.1 mM EDTA, 10 mM 2-mercaptoethanol  
380 β-ME) and sonicated. The lysate was centrifuged at 13,000 g for 40 min, and the  
381 supernatants were loaded onto a NiNTA column (His Trap, GE Healthcare). The  
382 column was equilibrated with buffer A, and His-tagged CcpE<sub>IBD</sub> protein was eluted  
383 using a linear gradient of 50-400 mM imidazole. Fractions enriched for 6His-CcpE<sub>IBD</sub>  
384 were pooled and concentrated. The proteins were further purified on a Superdex 200  
385 column (GE Healthcare) with buffer B (20 mM Tris-HCl, pH 8.0, 200 mM NaCl, 2  
386 mM DTT). Selenomethionine substituted 6His-CcpE<sub>IBD</sub> protein was expressed using  
387 the methionine biosynthesis inhibition method (25). The expression and purification  
388 of 6His-CcpE<sub>IBD</sub> protein was performed as described above.

389

390 **Crystallization and Structural Determination of CcpE<sub>IBD</sub>.** The 6His-CcpE<sub>IBD</sub>  
391 proteins and the selenomethionyl 6His-CcpE<sub>IBD</sub> proteins were concentrated to 12  
392 mg/ml in buffer B (20 mM Tris-HCl, pH8.0; 200 mM NaCl, 2 mM DTT),  
393 respectively. Crystallization was performed using the hanging drop vapor diffusion  
394 method at 22 °C. 1 μl of protein solution was mixed with 1μl of reservoir solution  
395 (0.1M Tris-HCl, pH8.5, 33% PEG3350) and equilibrated against 0.6 ml of reservoir  
396 solution. Octahedral shaped crystals appeared after a few days. Crystals were briefly

397 soaked in 0.1 M Tris-HCl, pH 8.5, 37% PEG3350, and cryocooled in liquid nitrogen.  
398 The diffraction data were collected at Shanghai Synchrotron Radiation Facility  
399 Beamline 17U. All of the x-ray data were processed using HKL2000 program suite  
400 (26) and converted to structural factors within the CCP4 program (27). Phasing was  
401 solved in SHELX using single wavelength anomalous dispersion data (28). A  
402 structural model was manually built in COOT (29), and computational refinement was  
403 carried out with the program REFMAC5 (30) in the CCP4 suite. Structural graphic  
404 figures were prepared in PyMOL (PyMOL Molecular Graphics System, Version 1.3  
405 Schrödinger, DeLano Scientific LLC). Atomic coordinates and structural factors have  
406 been deposited in the Protein Data Bank (PDB, [www.pdb.org](http://www.pdb.org)) under accession ID  
407 code 4QBA.

408

409 **Western Blot Analysis.** *S. aureus* strains were grown at 37 °C overnight in tryptic soy  
410 broth (TSB) containing 10 µg/ml tetracycline. Overnight cultures of the indicated *S.*  
411 *aureus* strains were washed twice and diluted 100-fold in fresh TSB medium  
412 (containing 10 µg/ml tetracycline) without glucose. The liquid cultures were grown in  
413 a tube with a tube volume-to-medium volume ratio of 5:1, shaken at 250 rpm at 37 °C  
414 for 6 h (OD<sub>600</sub> ≈ 5.0). 1 ml cells were harvested by centrifugation and washed with  
415 TE buffer (20 mM Tris-HCl, pH 8.0, 1 mM EDTA) and resuspended in 100 µl TE  
416 buffer. 1 µl 5mg/ml lysostaphin was added to the mixture and lysis at 37 °C for 3  
417 hours. 10 µl of the pellets sample was mixed with 10 µl of 2 × SDS loading buffer  
418 (50mM Tris-HCl, pH 6.8; 2% SDS; 0.1% bromophenol blue; 1% mercaptoethanol; 10%

419 glycerol) and then heated at 100 °C for 15 min. SDS polyacrylamide gel  
420 electrophoresis was carried out using a 10% slab gel with a 5% stacking gel and  
421 transferred onto PVDF (Bio-Rad) membranes. PageRuler™ Prestained Protein  
422 Ladder #SM0672 (Fermentas) was used as a molecular weight reference. For  
423 detection of CcpE protein, anti-CcpE polyclonal antibody (prepared by immunizing a  
424 rabbit with a 6His-CcpE protein, Shanghai Immune Biotech CO., Ltd) and anti-rabbit  
425 IgG antibody conjugated to horseradish peroxidase (HRP) (Code#: NA934, GE  
426 Healthcare) were used. For detection of ClpP protein, anti-ClpP polyclonal antibody  
427 (12) and anti-rabbit IgG antibody conjugated to horseradish peroxidase (HRP) (Code#: NA934, GE Healthcare) were used. The chemiluminescent was detected by a  
428 Tanon-5200 multi according to the manufacturer's recommendation.

430

431 **Whole-blood Killing Assays.** Overnight cultures of the indicated strains were washed  
432 twice and diluted 100-fold in fresh TSB medium without glucose. The liquid cultures  
433 were grown in a 20-ml tube with a tube volume-to-medium volume ratio of 5:1,  
434 shaken at 250 rpm at 37 °C for 2 h ( $OD_{600} \approx 0.5$ ). 1 ml of bacterial culture was  
435 centrifuged, and staphylococci were washed and suspended in 1 ml of sterile PBS in  
436 order to generate a suspension of  $1 \times 10^7$  CFU/ml. Whole blood from healthy human  
437 volunteers was collected using a BD VACUTAINER PT tube (363095). 450  $\mu$ l of  
438 whole blood was transferred into a 20-ml tube and mixed with 50  $\mu$ l bacterial sample,  
439 which resulted in  $1 \times 10^6$  CFU/ml. The tubes were incubated at 37 °C for 5 h with  
440 shaking (180 rpm), at which time dilutions were plated on a TSA agar plate for

441 enumeration of surviving CFU.

442

443 **Mouse Infection Model.** Since we observed that *S. aureus* Newman loses plasmid  
444 pYJ335 during infection, we used Newman/pCL-lacZ strain (wild-type Newman  
445 strain harbors a single-site integration vector pCL-lacZ),  $\Delta ccpE$ /pCL-lacZ strain  
446 ( $\Delta ccpE$  mutant harbors a single-site integration vector pCL-lacZ), and the  
447 complementary strain  $\Delta ccpE$ /pCL-*ccpE* ( $\Delta ccpE$  mutant harbors a single-site  
448 integration vector pCL-*ccpE*) to determine the effect of *ccpE* deletion on the virulence  
449 of *S. aureus* Newman strain.

450 An ca. 1.7 kb DNA fragment containing the *ccpE* gene and the  
451 tetracycline-inducible *xyl/tetO* promoter of pYJ335 were PCR amplified from p-*ccpE*  
452 DNA with primers *ccpE*-pCL-F (with *EcoRI* site) and *ccpE*-pCL-R (with *KpnI* site)  
453 (Table S2). The resulting PCR products were cut with the restriction enzymes *EcoRI*  
454 and *KpnI* and ligated with plasmid pCL-LacZ that had been cut with the same  
455 enzymes, generating pCL-*ccpE* (Table S1). The pCL-*ccpE* plasmid was electroporated  
456 into the *S. aureus* strain RN4220 and then transformed into mutants using  
457 bacteriophage  $\phi 85$ . As a control, the empty pCL-LacZ vector (8) was integrated into  
458 the chromosomes of Newman and  $\Delta ccpE$  through the use of a similar method.  
459 Overnight cultures in TSB medium (without glucose) of the indicated strains were  
460 washed and diluted 100-fold in fresh TSB medium (without glucose) in a 20-ml tube  
461 with a flask volume-to-medium volume ratio of 5:1. The liquid culture was grown at

462 37 °C for about 3 h with shaking (OD600 ≈3), 250 rpm of aeration, and then the  
 463 bacteria were harvested and washed twice with ice-cold, phosphate-buffered saline.  
 464 The CFU (Colony-Forming-Units) per milliliter were determined before mice were  
 465 inoculated.

466 Mouse infections were carried out as described previously (2, 5) with some  
 467 modifications, using 8-week-old female BALB/c mice obtained from Shanghai SLAC  
 468 Laboratory Animal Co. Ltd. and housed under specified pathogen-free conditions. All  
 469 animal experiments were reviewed and approved by the Institutional Animal Care and  
 470 Use Committee (IACUC) of the Shanghai Public Health Clinical Center and were  
 471 performed in accordance with the relevant guidelines and regulations. Mice were  
 472 anaesthetized with pentobarbital sodium (intraperitoneal injection, 80 mg/kg) and  
 473 were infected retro-orbitally with ca.  $3 \times 10^6$  cfu of each bacterial isolate. Animals  
 474 were sacrificed 5 days post infection. Kidneys and livers were aseptically removed  
 475 and homogenized in PBS plus 0.1% Triton X-100 to obtain single-cell suspensions.  
 476 Serial dilutions of each organ were plated on TSA (Difco) plates for the enumeration  
 477 of CFU.

478  
 479

480 **Table S1. Plasmids and strains used in this study**

481

| Strains or plasmids | Relevant genotype or characteristic                                                         | Source |
|---------------------|---------------------------------------------------------------------------------------------|--------|
| Plasmids            |                                                                                             |        |
| pKOR1               | Gene replacement vector for <i>S. aureus</i> genes, Amp <sup>r</sup> , Cm <sup>r</sup>      | (1)    |
| pYJ335              | <i>E. coli-S. aureus</i> shuttle vector, Cm <sup>r</sup> , Erm <sup>r</sup>                 | (6)    |
| pCL-lacZ            | <i>E.coli-S. aureus</i> shuttle cloning vector, single-copy integration vector in <i>S.</i> | (8)    |

|                                       |                                                                                                            |            |
|---------------------------------------|------------------------------------------------------------------------------------------------------------|------------|
|                                       | <i>aureus</i> ; pCL55 carrying promoterless <i>lacZ</i> ; Cm <sup>r</sup> in <i>S. aureus</i>              |            |
| pET28a                                | Km <sup>r</sup> , expression vector                                                                        | Novagen    |
| pET28b                                | Km <sup>r</sup> , expression vector                                                                        | Novagen    |
| pAT18                                 | A plasmid containing an <i>ermB</i> gene                                                                   | (4)        |
| pT181                                 | A tetracycline-resistance plasmid from <i>S. aureus</i>                                                    | (7)        |
| pYJ335-Tc                             | pYJ335 carrying a 1.6 kb tetracycline resistance cassette from plasmid pT181                               | This study |
| pET28a:: <i>ccpE</i>                  | pET28a derivative carrying <i>ccpE</i> (NWMN_0641) of <i>S. aureus</i> Newman                              | This study |
| pET28a:: <i>ccpE</i> <sub>R145A</sub> | pET28a:: <i>ccpE</i> carrying alanine substitution mutant at the site arginine 145 of CcpE                 | This study |
| pET28a:: <i>ccpE</i> <sub>R256A</sub> | pET28a:: <i>ccpE</i> carrying alanine substitution mutant at the site arginine 256 of CcpE                 | This study |
| p- <i>ccpE</i>                        | pYJ335 derivative carrying <i>ccpE</i> (NWMN_0641) in the downstream of the <i>xyl/tet</i> promoter region | This study |
| pT- <i>ccpE</i>                       | Plasmid pYJ335-Tc carrying CcpE                                                                            | This study |
| pT- <i>ccpE</i> <sub>R145A</sub>      | pT- <i>ccpE</i> carrying alanine substitution mutant at the site arginine 145 of CcpE                      | This study |
| pT- <i>ccpE</i> <sub>R256A</sub>      | pT- <i>ccpE</i> carrying alanine substitution mutant at the site arginine 256 of CcpE                      | This study |
| p- <i>citB</i>                        | pYJ335 carrying <i>citB</i> (NWMN_1263) in the downstream of the <i>xyl/tet</i> promoter region            | This study |
| pKOR1:: $\Delta$ <i>ccpE</i>          | pKOR1 derivative, for deletion of <i>ccpE</i> gene                                                         | This study |
| pKOR1:: $\Delta$ <i>citB</i>          | pKOR1 derivative, for deletion of <i>citB</i> gene                                                         | This study |
| pCL- <i>citB-lacZ</i>                 | pCL- <i>lacZ</i> derivative carrying <i>citB</i> (NWMN_1263) promoter                                      | This study |
| pCL- <i>cap5A-lacZ</i>                | pCL- <i>lacZ</i> derivative carrying <i>cap5A</i> (NWMN_0095) promoter                                     | This study |
| pCL- <i>SAV1168-lacZ</i>              | pCL- <i>lacZ</i> derivative carrying NWMN_1077 ( <i>SAV1168</i> in <i>S. aureus</i> Mu50 ) promoter        | This study |
| pCL- <i>citB-M-lacZ</i>               | pCL- <i>citB-lacZ</i> derivative carrying <i>citB</i> promoter with mutations in the CcpE binding site     | This study |
| pCL- <i>SAV1168-M-lacZ</i>            | pCL- <i>SAV1168-lacZ</i> derivative carrying                                                               | This study |

|                                                                    |                                                                                                    |            |
|--------------------------------------------------------------------|----------------------------------------------------------------------------------------------------|------------|
|                                                                    | SAV1168 promoter with mutations in the CcpE binding site                                           |            |
| pCL- <i>crtO-lacZ</i>                                              | pCL-lacZ derivative carrying <i>crtO</i> promoter                                                  | This study |
| pCL:: <i>ccpE</i>                                                  | pCL-lacZ derivative carrying <i>ccpE</i> ( <i>NWMN_0641</i> ) gene                                 | This study |
| Strains                                                            |                                                                                                    |            |
| Newman                                                             | Wild-type, <i>S. aureus</i> ATCC 25904                                                             | (31)       |
| JE2                                                                | <i>S. aureus</i> LAC cured of all 3 native plasmids; Erm <sup>s</sup>                              | (32)       |
| RN4220                                                             | Derivative of 8325-4 that accepts plasmids                                                         | (33)       |
| $\Delta$ <i>ccpE</i>                                               | <i>ccpE</i> gene deletion mutant of Newman strain                                                  | This study |
| $\Delta$ <i>citB</i>                                               | <i>citB</i> gene deletion mutant of Newman strain                                                  | This study |
| $\Delta$ <i>ccpE<math>\Delta</math><i>citB</i></i>                 | <i>ccpE</i> and <i>citB</i> double gene deletion mutant of Newman strain                           | This study |
| JE2- $\Delta$ <i>ccpE</i>                                          | <i>ccpE</i> deletion mutant of JE2 strain; transduced from $\Delta$ <i>ccpE</i> . Erm <sup>f</sup> | This study |
| JE2- <i>citB</i>                                                   | <i>citB</i> insertion mutant (NE861) of JE2 strain                                                 | (32)       |
| Newman::pCL-lacZ                                                   | <i>S. aureus</i> Newman carrying an empty integration vector pCL-lacZ                              | This study |
| Newman:: <i>citB-lacZ</i>                                          | <i>S. aureus</i> Newman carrying an integration vector pCL- <i>citB-lacZ</i>                       | This study |
| Newman::SAV1168- <i>lacZ</i>                                       | <i>S. aureus</i> Newman carrying an integration vector pCL-SAV1168- <i>lacZ</i>                    | This study |
| Newman:: <i>cap5A-lacZ</i>                                         | <i>S. aureus</i> Newman carrying an integration vector pCL- <i>cap5A-lacZ</i>                      | This study |
| $\Delta$ <i>ccpE</i> ::pCL-lacZ                                    | $\Delta$ <i>ccpE</i> strain carrying an integration vector pCL-lacZ                                | This study |
| $\Delta$ <i>ccpE</i> :: <i>citB-lacZ</i>                           | $\Delta$ <i>ccpE</i> strain carrying an integration vector pCL- <i>citB-lacZ</i>                   | This study |
| $\Delta$ <i>ccpE</i> ::SAV1168- <i>lacZ</i>                        | $\Delta$ <i>ccpE</i> strain carrying an integration vector pCL-SAV1168- <i>lacZ</i>                | This study |
| $\Delta$ <i>ccpE</i> :: <i>cap5A-lacZ</i>                          | $\Delta$ <i>ccpE</i> strain carrying an integration vector pCL- <i>cap5A-lacZ</i>                  | This study |
| $\Delta$ <i>ccpE</i> ::pCL- <i>ccpE</i> ( $\Delta$ <i>ccpE</i> -C) | $\Delta$ <i>ccpE</i> strain carrying an integration vector pCL- <i>ccpE</i>                        | This study |
| Newman:: <i>citB-M-lacZ</i>                                        | <i>S. aureus</i> Newman carrying an integration vector pCL- <i>citB-M-lacZ</i>                     | This study |
| $\Delta$ <i>ccpE</i> :: <i>citB-M-lacZ</i>                         | $\Delta$ <i>ccpE</i> strain carrying an integration                                                | This study |



|                                          |                                                                                         |            |
|------------------------------------------|-----------------------------------------------------------------------------------------|------------|
|                                          | vector pCL- <i>citB-M-lacZ</i>                                                          |            |
| $\Delta ccpE\Delta citB::citB-lacZ$      | $\Delta ccpE\Delta citB$ strain carrying an integration vector pCL- <i>citB-lacZ</i>    | This study |
| $\Delta ccpE\Delta citB::SAV1168-lacZ$   | $\Delta ccpE\Delta citB$ strain carrying an integration vector pCL- <i>SAV1168-lacZ</i> | This study |
| $\Delta ccpE\Delta citB::cap5A-lacZ$     | $\Delta ccpE\Delta citB$ strain an integration vector pCL- <i>cap5A-lacZ</i>            | This study |
| $\Delta citB::citB-lacZ$                 | $\Delta citB$ strain carrying an integration vector pCL- <i>citB-lacZ</i>               | This study |
| $\Delta citB::SAV1168-lacZ$              | $\Delta citB$ strain carrying an integration vector pCL- <i>SAV1168-lacZ</i>            | This study |
| $\Delta citB::cap5A-lacZ$                | $\Delta citB$ strain carrying an integration vector pCL- <i>cap5A-lacZ</i>              | This study |
| JE2:: <i>citB-lacZ</i>                   | JE2 carrying an integration vector pCL- <i>citB-lacZ</i>                                | This study |
| JE2:: <i>SAV1168-lacZ</i>                | JE2 carrying an integration vector pCL- <i>SAV1168-lacZ</i>                             | This study |
| JE2- $\Delta ccpE::citB-lacZ$            | JE2- $\Delta ccpE$ strain carrying an integration vector pCL- <i>citB-lacZ</i>          | This study |
| JE2- $\Delta ccpE::SAV1168-lacZ$         | JE2- $\Delta ccpE$ strain carrying an integration vector pCL- <i>SAV1168-lacZ</i>       | This study |
| Newman/pYJ335                            | Newman strain carrying plasmid pYJ335                                                   | This study |
| $\Delta ccpE/pYJ335$                     | $\Delta ccpE$ strain carrying plasmid pYJ335                                            | This study |
| $\Delta ccpE/p-ccpE$                     | $\Delta ccpE$ strain carrying p- <i>ccpE</i>                                            | This study |
| $\Delta ccpE/p-citB$                     | $\Delta ccpE$ strain carrying p- <i>citB</i>                                            | This study |
| $\Delta citB/pYJ335$                     | $\Delta citB$ strain carrying plasmid pYJ335                                            | This study |
| $\Delta citB/p-citB$                     | $\Delta citB$ strain carrying plasmid p- <i>citB</i>                                    | This study |
| Newman:: <i>citB-lacZ</i> /pYJ335-Tc     | Newman:: <i>citB-lacZ</i> carrying plasmid pYJ335-Tc                                    | This study |
| $\Delta ccpE::citB-lacZ/pYJ335-Tc$       | $\Delta ccpE::citB-lacZ$ carrying plasmid pYJ335-Tc                                     | This study |
| $\Delta ccpE::citB-lacZ/pT-ccpE$         | $\Delta ccpE::citB-lacZ$ carrying plasmid pT- <i>ccpE</i>                               | This study |
| $\Delta ccpE::citB-lacZ/pT-ccpE_{R145A}$ | $\Delta ccpE::citB-lacZ$ carrying plasmid pT- <i>ccpE</i> <sub>R145A</sub>              | This study |
| $\Delta ccpE::citB-lacZ/pT-ccpE_{R256A}$ | $\Delta ccpE::citB-lacZ$ carrying plasmid pT- <i>ccpE</i> <sub>R256A</sub>              | This study |
| JE2/pYJ335                               | JE2 carrying plasmid pYJ335                                                             | This study |
| JE2- $\Delta ccpE/pYJ335$                | JE2- $\Delta ccpE$ carrying plasmid pYJ335                                              | This study |
| JE2- <i>citB</i> /pYJ335                 | JE2- <i>citB</i> carrying plasmid pYJ335                                                | This study |
| JE2- <i>citB</i> /p- <i>citB</i>         | JE2- <i>citB</i> carrying plasmid p- <i>citB</i>                                        | This study |
| JE2- $\Delta ccpE/p-ccpE$                | JE2- $\Delta ccpE$ carrying plasmid p- <i>ccpE</i>                                      | This study |

|                |                                                                                                                        |                  |
|----------------|------------------------------------------------------------------------------------------------------------------------|------------------|
| <i>E. coli</i> |                                                                                                                        |                  |
| BL21(DE3)      | F <sup>-</sup> <i>ompT hsdS<sub>B</sub> (r<sub>B</sub><sup>-</sup> m<sub>B</sub><sup>-</sup>) gal dcm met</i><br>(DE3) | Laboratory stock |
| DH5α           | <i>endA hsdR17 supE44 thi-1 recA1 gyrA relA1Δ(lacZYA-argF)U169 deoR</i><br>(φ80 <i>dlacΔ(lacZ)M15</i> )                | Laboratory stock |

482 Amp<sup>r</sup>, ampicillin resistance; Kan<sup>r</sup>, kanamycin resistance; Cm<sup>r</sup>, chloroamphenicol  
483 resistance; Erm<sup>r</sup>, erythromycin resistance; Tet<sup>r</sup>, tetracycline resistance

484

485

486 **Table S2. Primers used in this study.**

| Primers     | Sequence (5' to 3')                                                 |
|-------------|---------------------------------------------------------------------|
| ccpE-up-F   | GCCGGATCCTGAAGGTGGTTTCTAT                                           |
| ccpE-up-R   | CGCGAAGCTTAGTCTTCAATCTTCATA                                         |
| ccpE-down-F | CGCAAGCTTAAAAGTAGAAATTGAT                                           |
| ccpE-down-R | GGCCCCCTCGAGAACCTATACTTACT                                          |
| erm-F       | GGGCAAGCTTAGCCATGACTTTTTTTAG                                        |
| erm-R       | GGGAAGCTTTCTCCATTCCCTTTAGTAAC                                       |
| ccpE-BP-F   | GGGGACAAGTTTGTACAAAAAAGCAGGCTTGAAGGTG<br>GTTTCTATAGAGAGA            |
| ccpE-BP-R   | GGGGACCACTTTGTACAAGAAAGCTGGGTAAGCCAAC<br>CCATAATACTAAAA             |
| citB-up-F   | GGAATTCATATGATCTGTATTTGCGACAATCGT                                   |
| citB-up-R   | CGCGGATCCATTTAATGATCCCCCTTGATA                                      |
| citB-down-F | CGCGGATCCCTCGTGACTGGGCAGCAAAAAG                                     |
| citB-down-R | CCGCTCGAGGATTGGCTCGCTTATCATTCA                                      |
| citB-BP-F   | GGGGACAAGTTTGTACAAAAAAGCAGGCTGGAATTCCA<br>TATGATCTGTATTTGCGACAATCGT |
| citB-BP-R   | GGGGACCACTTTGTACAAGAAAGCTGGGTCCGCTCGAG<br>GATTGGCTCGCTTATCATTCA     |
| ccpE-F      | AATAATTGAATAATTTATGGGGGAAATT                                        |
| ccpE-R      | CTACGCCTTTGGTTGTTCAACAA                                             |
| ccpE-R-tet  | CCCGAATTCCACGCCTTTGGTTGTTCAACAA                                     |
| tet-F       | CCCGAATTCAATCGATTTTTGGCAACA                                         |
| tet-R       | AAATGCTAGCCACTCATAGTTC                                              |
| citB-F      | ACCTAAATTAAGCGTTTTTCTAAG                                            |
| citB-R      | ACTATCAAAGTGCCTCAAATACCGA                                           |
| SAV1609-F   | CAATCACACCAGTCATCAAC (For qRT-PCR)                                  |

|                        |                                              |
|------------------------|----------------------------------------------|
| SAV1609-R              | AAGTATTTAGCAGCGAGCGTGA (For qRT-PCR)         |
| SAV1168-F              | TGTCCACCGATGATAGTTTGTGT (For qRT-PCR)        |
| SAV1168-R              | GTTTGGCATAGTCATTTCAAGTGT (For qRT-PCR)       |
| SAV1064-F              | AACAAGTAGTATCCGCACATCGT (For qRT-PCR)        |
| SAV1064-R              | TACCTCCTGGCATTGAACAAT (For qRT-PCR)          |
| SAV1048-F              | ATTTTTCCTTTACTTTCCGACATTG (For qRT-PCR)      |
| SAV1048-R              | TTATCCAAATGGTGGTTTCACTGCT (For qRT-PCR)      |
| SAV0812-F              | CAACAACGCATCAATCACCTAC (For qRT-PCR)         |
| SAV0812-R              | G TTCACGCTTGATTACACGCTTC (For qRT-PCR)       |
| SAV0423-F              | TGGTCTTTACGGTGAAATGAGT (For qRT-PCR)         |
| SAV1813-F              | ATTCTATCTTTCGCTTTTGCTCCTT (For qRT-PCR)      |
| SAV1813-R              | ATTCAGTGGTAGTATTTGCGGGTG (For qRT-PCR)       |
| SAV0423-R              | ATAACATCGGACATACGGTCTTCT (For qRT-PCR)       |
| SAV0149-F              | AAGGGTGACAATCCTCAGTTTA (For qRT-PCR)         |
| SAV0149-R              | CCGAATCTCGTTTATGACCACTT (For qRT-PCR)        |
| SACOL0209-F            | GCTCATCTAAACTTGAACATAAACC (For qRT-PCR)      |
| SACOL0209-R            | ATGGCTTATTGAATCTTGGTCT (For qRT-PCR)         |
| sirB-F                 | GATAAGACCCACAAAGACG (For qRT-PCR)            |
| sirB-R                 | GATTATCCGCTTGTATTG (For qRT-PCR)             |
| 16sRNA-F               | CGTGGAGGGTCATTGGA (For qRT-PCR)              |
| 16sRNA-R               | CGTTTACGGCGTGGACTA (For qRT-PCR)             |
| ccpE-PF                | GGGGGATCCATGAAGATTGAAGACTA                   |
| ccpE-PR                | CCGACTCGAGTCTAAACTACGCCT                     |
| ccpE <sub>IBD</sub> -F | CCGGAATTTCGATGATTATTGAGCATGCCCGTGAC          |
| ccpE <sub>IBD</sub> -R | CCGCTCGAGCTACGCCTTTGGTTGTTCAACAAAG           |
| R145AF                 | GATTATCATGTTATGATAACTGCCGGAAATAAGGTAATG      |
| R145AR                 | AAATTCATTACCTTATTTCCGGCAGTTATCATAACATG       |
| R256AF                 | GAACCGCTGATTGCCTCGACATTTATGAGTTATGATC        |
| R256AR                 | TCATAAATGTCGAGGCAATCAGCGGTTTATTATCAATTT<br>C |
| ccpE-pCL-F             | GGGAATTCCTTGGTTACCGTGAAGTTACCATCACGG         |
| ccpE-pCL-R             | CGGGGTACCCTACGCCTTTGGTTGTTCAACAA             |
| lacZ0149-F             | CTAAGAATTCAGAAGCACTAATCAGTG                  |
| lacZ0149-R             | TAAGGTACCGATTGTCACCCTTAG                     |
| lacZ1350-F             | ATTAAACTACGAATTCTCGATTTTT                    |
| lacZ1350-R             | CCGGGTACCTTTTAAATCATAGTAAG                   |
| lacZ1168-F             | GTTAATAAGAATTCTACCTCTTGTC                    |
| lacZ1168-R             | CCGGGTACCTTGATTAATCATTGATATTAGTCTCGT         |
| citB-M-F               | TATAAGCAAAGTGGCGCATAACAGGTAAGGTGTAATAA       |
| citB-M-R               | CCTTACCTGTATGCGCCACTTTGCTTATATACTCTGA        |
| 1350FAM                | FAM-CTTCTACAGCTTTTAAATCATAGTAAG              |
| 1168FAM                | FAM-TTGATTAATCATTGATATTAGTCTCGT              |
| cap-p-F                | ACAATCATTTTTTTAAATAAAGAA                     |

|             |                                                     |
|-------------|-----------------------------------------------------|
| cap-p-R     | TTTGATTCACTAAGATTTGAG                               |
| 1168-p-F    | TTGATTAACTCATTGATATTAGTCTCGT                        |
| 1168-p-R    | TTTCTGTCCAAAACCTTAAAAATGAT                          |
| citB-p-F    | CCGGAATTCATAATTATTCTCAATTA                          |
| citB-p-R    | CTTCTACAGCTTTTAAATCATAGTAAG                         |
| citB-pB-F   | TGTATGATAAGTTTTGCTTATATACTCTGATTAAAAAGTC<br>AAAACCT |
| citB-pM-F   | TGTATGCGCCACTTTGCTTATATACTCTGATTAAAAAGTC<br>AAAACCT |
| ccpE-cF     | GTTACACAAAGACTAAAAGCTATTG                           |
| ccpE-cR     | GTAACCTTTGTAACATCATCTCG                             |
| citB-pc-F   | CCGGAATTCACTCTGATTAAAAAGTCAA                        |
| citB-12F    | ATCATTTCTGTCCCCTCCCATC                              |
| citB-12R    | GTAAGTATAACTTTGGCCATTCAAGTC                         |
| 1168M1F     | CTTAAACAGTTAGTAGTGTTATGGCCATAAACT<br>TATCATT        |
| 1168M1R     | AAACTTAAAAATGATAAGTTTTATGGCCATAAACTACT<br>AA        |
| lacZ-crtO-F | AACGAATTCCTTGGACAGGAAATTGGAA                        |
| lacZ-crtO-R | AAAGGTACCTGGTTTTTCATCTAAATTGAATCACT                 |

487

488

489 **Table S3. Data collection and refinement statistics of SeMet-substituted CcpE<sub>IBD</sub>**  
490 **crystal**<sup>a</sup>

|                                    | Se-CcpE <sub>IBD</sub> (4QBA)      |
|------------------------------------|------------------------------------|
| <b>Data collection</b>             |                                    |
| Space group                        | P 21 21 21                         |
| Cell dimensions                    |                                    |
| <i>a</i> , <i>b</i> , <i>c</i> (Å) | 73.60, 77.18, 93.97                |
| $\alpha$ , $\beta$ , $\gamma$ (°)  | 90, 90, 90                         |
| Resolution (Å)                     | 50.0-2.20 (2.28-2.20) <sup>b</sup> |
| No. of observations                | 379242                             |
| No. unique                         | 51385 (5157)                       |
| $R_{\text{sym}}^c$                 | 0.071 (0.485)                      |
| $I/\sigma(I)$                      | 20.0 (3.7)                         |
| Completeness (%)                   | 99.4 (100)                         |
| Redundancy                         | 7.4 (7.6)                          |
| <b>Data refinement</b>             |                                    |
| Resolution (Å)                     | 30.0-2.21 (2.26-2.21)              |
| No. reflections                    | 25824 (1791)                       |
| $R_{\text{work}}/R_{\text{free}}$  | 20.2/24.3                          |
| No. atoms                          |                                    |

|                                |       |
|--------------------------------|-------|
| Protein                        | 3226  |
| Ligand                         | 2     |
| Solvent                        | 67    |
| B factors (Å <sup>2</sup> )    | 54.7  |
| Rmsd <sup>d</sup> in           |       |
| Bond lengths (Å)               | 0.008 |
| Bond angles (°)                | 1.291 |
| Ramachandran Plot <sup>e</sup> |       |
| Favored (%)                    | 98.0  |
| Accepted (%)                   | 1.8   |
| Outliers (%)                   | 0.2   |

491 <sup>a</sup>Each structure was solved using one crystal.

492 <sup>b</sup>Highest resolution shell is shown in parenthesis.

493 <sup>c</sup> $R_{\text{sym}} = \Sigma(|I - \langle I \rangle|) / \Sigma(I)$ , where I is the observed intensity.

494 <sup>d</sup>Root mean squared deviation.

495 <sup>e</sup>Values calculated in CCP4 suite using Procheck.

496

497

498 **Table S4. 55 genes whose expressions are down-regulated more than 2-fold in**

499 ***AccpE* strain compared to the wild-type Newman strain**

| Gene      | Fold change* | Target description                                | Biological process |
|-----------|--------------|---------------------------------------------------|--------------------|
| SAV1168   | 0.11         | Superantigen-like protein                         | Pathogenesis       |
| SAV1167   | 0.13         | Superantigen-like protein                         | Pathogenesis       |
| SAV1166   | 0.15         | Superantigen-like protein                         | Pathogenesis       |
| SAV0814   | 0.15         | Extracellular matrix binding protein              | Pathogenesis       |
| SACOL0859 | 0.19         | Extracellular matrix and plasma binding protein   | Pathogenesis       |
| SAV0812   | 0.20         | Secreted von Willebrand factor-binding protein    | Pathogenesis       |
| SAV0426   | 0.21         | Superantigen-like protein Set11                   | Pathogenesis       |
| SACOL0857 | 0.24         | Staphylocoagulase precursor                       | Pathogenesis       |
| SAV0423   | 0.24         | Superantigen-like protein Set7                    | Pathogenesis       |
| SA1755    | 0.29         | Chemotaxis-inhibiting protein CHIPS               | Pathogenesis       |
| SAV0428   | 0.29         | Superantigen-like protein Set13                   | Pathogenesis       |
| SAV1156   | 0.31         | Formyl peptide receptor-like 1 inhibitory protein | Pathogenesis       |
| SAV0813   | 0.31         | Extracellular ECM and plasma binding protein Ssp  | Pathogenesis       |
| SAV0427   | 0.32         | Superantigen-like protein Set12                   | Pathogenesis       |

|           |      |                                                                |                             |
|-----------|------|----------------------------------------------------------------|-----------------------------|
| SAV0429   | 0.33 | Superantigen-like protein Set14                                | Pathogenesis                |
| SAV0229   | 0.33 | Complement inhibitor                                           | Pathogenesis                |
| SAV2503   | 0.35 | Fibronectin-binding protein FnbA                               | Pathogenesis                |
| SA0385    | 0.36 | Superantigen-like protein Set9                                 | Pathogenesis                |
| SAV0424   | 0.37 | Superantigen-like protein Set8                                 | Pathogenesis                |
| SACOL0209 | 0.37 | Staphylocoagulase precursor                                    | Pathogenesis                |
| SAV0370   | 0.42 | Enterotoxin                                                    | Pathogenesis                |
| SAV0425   | 0.44 | Superantigen-like protein Set10                                | Pathogenesis                |
| SAV2502   | 0.46 | Fibronectin-binding protein FnbB                               | Pathogenesis                |
| SAV1604   | 0.12 | Transmembrane transport protein                                | Transport                   |
| SAV2438   | 0.17 | Amino acid ABC transporter                                     | Transport                   |
| SAV0736   | 0.37 | Iron complex transport system substrate-binding protein        | Transport                   |
| SA0325    | 0.43 | Glycerol-3-phosphate transporter                               | Transport                   |
| SAV0115   | 0.45 | Iron(III) ABC transporter SirA                                 | Transport                   |
| SAV2352   | 0.47 | Multidrug resistance protein                                   | Transport                   |
| SAV0114   | 0.48 | Iron(III) ABC transporter SirB                                 | Transport                   |
| SAV1607   | 0.10 | Acetyl-CoA carboxylase biotin carboxyl carrier protein subunit | Metabolic process           |
| SAV1606   | 0.11 | Acetyl-CoA carboxylase                                         | Metabolic process           |
| SAV1608   | 0.14 | Putative urea carboxylase                                      | Metabolic process           |
| SAV1350   | 0.16 | Aconitate hydratase CitB                                       | Metabolic process           |
| SAV1609   | 0.18 | Urea carboxylase                                               | Metabolic process           |
| SAV0984   | 0.49 | 3-oxoacyl-ACP synthase                                         | Metabolic process           |
| SAV0672   | 0.04 | Transcriptional regulator CcpE                                 | Regulation of transcription |
| SAV0518   | 0.38 | GntR family transcriptional regulator                          | Regulation of transcription |
| SAV0698   | 0.38 | Transcription repressor of fructose operon                     | Regulation of transcription |
| SAV2357   | 0.40 | TcaR transcription regulator                                   | Regulation of transcription |
| SAV1273   | 0.27 | 30S ribosomal protein S15                                      | Translation                 |
| SAV0539   | 0.37 | 50S ribosomal protein L10                                      | Translation                 |
| SAV1605   | 0.12 | LamB/YcsF family protein                                       | Unclassified                |
| SAV0579   | 0.43 | VraX                                                           | Unclassified                |
| SAV0023   | 0.44 | 5'-nucleotidase                                                | Unclassified                |
| SAV1638   | 0.26 | Hypothetical protein                                           | Hypothetical protein        |
| SAV0371   | 0.29 | Hypothetical protein                                           | Hypothetical protein        |
| SAV2556   | 0.30 | Hypothetical protein                                           | Hypothetical protein        |

|           |      |                      |                      |
|-----------|------|----------------------|----------------------|
| SAV0220   | 0.35 | Hypothetical protein | Hypothetical protein |
| SACOL0479 | 0.38 | Hypothetical protein | Hypothetical protein |
| SAV2611   | 0.44 | Hypothetical protein | Hypothetical protein |
| SAV1036   | 0.45 | Hypothetical protein | Hypothetical protein |
| SAV1421   | 0.47 | Hypothetical protein | Hypothetical protein |
| SAV2592   | 0.48 | Hypothetical protein | Hypothetical protein |
| SAV0373   | 0.48 | Hypothetical protein | Hypothetical protein |

500 <sup>a</sup> Genes are referenced with *S. aureus* strain Mu50, COL, or N315. \*Microarray data  
501 were analyzed with SAM (Significance Analysis of Microarrays) software. The  
502 criterion of cutoff limitation as a fold change  $\geq 2$  or  $\leq 0.5$  and q-value  $\leq 5\%$  was used in  
503 order to select differential expression genes.

504

505

506 **Table S5. 71 genes whose expressions are up-regulated more than 2-fold in  $\Delta$ accPE**  
507 **strain compared to the wild-type Newman strain**

| Gene <sup>a</sup> | Fold change* | Target description                             | Biological Process |
|-------------------|--------------|------------------------------------------------|--------------------|
| SAV0152           | 10.03        | Capsular polysaccharide synthesis enzyme Cap5D | Pathogenesis       |
| SAV0151           | 9.24         | Capsular polysaccharide synthesis enzyme Cap8C | Pathogenesis       |
| SAV0150           | 8.90         | Capsular polysaccharide synthesis enzyme Cap5B | Pathogenesis       |
| SAV0149           | 8.49         | Capsular polysaccharide synthesis enzyme Cap5A | Pathogenesis       |
| SAV0154           | 8.35         | Capsular polysaccharide synthesis enzyme Cap5F | Pathogenesis       |
| SAV0156           | 8.09         | Capsular polysaccharide synthesis enzyme Cap5H | Pathogenesis       |
| SAV0153           | 7.95         | Capsular polysaccharide synthesis enzyme Cap8E | Pathogenesis       |
| SAV0155           | 7.70         | Capsular polysaccharide synthesis enzyme Cap5G | Pathogenesis       |

|           |      |                                                 |                     |
|-----------|------|-------------------------------------------------|---------------------|
| SAV0163   | 6.49 | Capsular polysaccharide synthesis enzyme Cap8O  | Pathogenesis        |
| SAV0160   | 6.16 | Capsular polysaccharide synthesis enzyme Cap5L  | Pathogenesis        |
| SAV0157   | 6.11 | Capsular polysaccharide synthesis enzyme Cap5I  | Pathogenesis        |
| SAV0159   | 5.90 | Capsular polysaccharide synthesis enzyme Cap5K  | Pathogenesis        |
| SAV0162   | 5.88 | Capsular polysaccharide synthesis enzyme Cap5N  | Pathogenesis        |
| SAV0164   | 5.80 | Capsular polysaccharide synthesis enzyme Cap5P  | Pathogenesis        |
| SAV0161   | 5.35 | Capsular polysaccharide synthesis enzyme Cap5M  | Pathogenesis        |
| SAV0158   | 5.11 | Capsular polysaccharide synthesis enzyme Cap5J  | Pathogenesis        |
| SACOL1865 | 4.40 | Serine protease SplE                            | Pathogenesis        |
| SAV1809   | 4.24 | Serine protease SplF                            | Pathogenesis        |
| SAV1813   | 3.97 | Serine protease SplA                            | Pathogenesis        |
| SAV1812   | 3.61 | Serine protease SplB                            | Pathogenesis        |
| SAV1048   | 3.21 | Serine protease SspA                            | Pathogenesis        |
| SAV1909   | 3.02 | Cysteine protease Staphopain A                  | Pathogenesis        |
| SAV0815   | 2.89 | Nuclease Nuc                                    | Pathogenesis        |
| SAV1047   | 2.87 | Cysteine protease SspB                          | Pathogenesis        |
| SAV2654   | 2.84 | Serine-threoinine rich antigen                  | Pathogenesis        |
| SAV2637   | 2.49 | Zinc metalloproteinase aureolysin               | Pathogenesis        |
| SAV2638   | 2.21 | Immunodominant antigen B                        | Pathogenesis        |
| SAV2388   | 2.68 | Nitrite extrusion protein                       | Transport           |
| SAV2653   | 2.38 | Preprotein translocase subunit SecY             | Transport           |
| SAV1933   | 2.36 | ABC transporter ATP-binding protein             | Transport           |
| SAV2415   | 2.31 | Multidrug resistance protein YcnB               | Transport           |
| SAV0383   | 2.18 | Proton/sodium-glutamate symport protein         | Transport           |
| SAV1816   | 2.18 | Lantibiotic ABC transporter protein             | Transport           |
| SAV0103   | 2.15 | Major facilitator transporter                   | Transport           |
| SAV1931   | 2.07 | ABC transporter ATP-binding protein             | Transport           |
| SAV1068   | 4.99 | Phosphoribosylformylglycinamide synthase I PurQ | Purine biosynthesis |
| SAV1064   | 4.98 | Phosphoribosylaminoimidazole                    | Purine              |



|           |      |                                                               |                             |
|-----------|------|---------------------------------------------------------------|-----------------------------|
|           |      | carboxylase                                                   | biosynthesis                |
| SAV1067   | 4.76 | Phosphoribosylformylglycinamide synthase PurS                 | Purine biosynthesis         |
| SAV1066   | 4.70 | Phosphoribosylaminoimidazole-succinocarboxamide synthase PurC | Purine biosynthesis         |
| SAV1069   | 4.01 | phosphoribosylformylglycinamide synthase II PurL              | Purine biosynthesis         |
| SAV1065   | 3.83 | Phosphoribosylaminoimidazole carboxylase ATPase subunit PurK  | Purine biosynthesis         |
| SAV0095   | 3.21 | 1-phosphatidylinositol phosphodiesterase precursor            | Metabolic process           |
| SAV0177   | 2.83 | Formate dehydrogenase                                         | Metabolic process           |
| SAV1114   | 2.39 | Pyruvate carboxylase                                          | Metabolic process           |
| SAV1026   | 3.59 | Competence transcription factor                               | Regulation of transcription |
| SACOL1871 | 2.05 | Epidermin immunity protein F                                  | Unclassified                |
| SAV2096   | 2.01 | ssDNA-binding protein                                         | Unclassified                |
| SAV0808   | 4.89 | Hypothetical protein                                          | Hypothetical protein        |
| SAV2205   | 4.05 | Hypothetical protein                                          | Hypothetical protein        |
| SACOL0850 | 3.82 | Hypothetical protein                                          | Hypothetical protein        |
| SAV0170   | 3.41 | Hypothetical protein                                          | Hypothetical protein        |
| SACOL1870 | 2.85 | Hypothetical protein                                          | Hypothetical protein        |
| SAV0807   | 2.81 | Hypothetical protein                                          | Hypothetical protein        |
| SAV0596   | 2.72 | Hypothetical protein                                          | Hypothetical protein        |
| SACOL0643 | 2.63 | Hypothetical protein                                          | Hypothetical protein        |
| SACOL2202 | 2.56 | Hypothetical protein                                          | Hypothetical protein        |
| SACOL1532 | 2.53 | Hypothetical protein                                          | Hypothetical protein        |
| SACOL1533 | 2.50 | Hypothetical protein                                          | Hypothetical protein        |
| SAV2543   | 2.37 | Hypothetical protein                                          | Hypothetical protein        |

|           |      |                      |                      |
|-----------|------|----------------------|----------------------|
| SAV2342   | 2.31 | Hypothetical protein | Hypothetical protein |
| SACOL0486 | 2.30 | Hypothetical protein | Hypothetical protein |
| SAV2587   | 2.29 | Hypothetical protein | Hypothetical protein |
| SAV2492   | 2.28 | Hypothetical protein | Hypothetical protein |
| SACOL2201 | 2.27 | Hypothetical protein | Hypothetical protein |
| SAV0289   | 2.20 | Hypothetical protein | Hypothetical protein |
| SAV0740   | 2.18 | Hypothetical protein | Hypothetical protein |
| SAV2474   | 2.17 | Hypothetical protein | Hypothetical protein |
| SAV0859   | 2.14 | Hypothetical protein | Hypothetical protein |
| SACOL2205 | 2.11 | Hypothetical protein | Hypothetical protein |
| SAV0297   | 2.07 | Hypothetical protein | Hypothetical protein |
| SAV0447   | 2.02 | Hypothetical protein | Hypothetical protein |

508 <sup>a</sup> Genes are referenced with *S. aureus* strain Mu50 or COL. \*Microarray data were  
509 analyzed with SAM (Significance Analysis of Microarrays) software. The criterion of  
510 cutoff limitation as a fold change  $\geq 2$  or  $\leq 0.5$  and q-value  $\leq 5\%$  was used in order to  
511 select differential expression genes.

512

513

514

515 **Table S6. Verification of microarray results by Real-Time RT-PCR<sup>a</sup>**

| Gene    | Target description                                | Microarray | qRT-PCR |
|---------|---------------------------------------------------|------------|---------|
| SAV0149 | Capsular polysaccharide synthesis<br>enzyme Cap5A | 8.49       | 6.43    |
| SAV1168 | Superantigen-like protein                         | 0.11       | 0.14    |
| SAV1048 | Serine protease SspA                              | 3.21       | 3.22    |

|           |                                                |      |                   |
|-----------|------------------------------------------------|------|-------------------|
| SAV0812   | Secreted von Willebrand factor-binding protein | 0.20 | 0.44              |
| SAV1609   | Urea carboxylase                               | 0.18 | 0.20              |
| SAV0423   | Superantigen-like protein Set7                 | 0.24 | 0.59              |
| SAV1813   | Serine protease SplA                           | 3.97 | 2.83              |
| SAV1064   | Phosphoribosylaminoimidazole carboxylase       | 4.98 | 2.01              |
| SACOL0209 | Staphylocoagulase precursor                    | 0.37 | 0.51              |
| SAV0114   | Iron(III) ABC transporter SirB                 | 0.48 | 0.47              |
| SAV0114   | Iron(III) ABC transporter SirB                 | N/A  | 0.17 <sup>b</sup> |

516 <sup>a</sup>The primers used for Real-Time RT-PCR are listed in Table S2. <sup>b</sup>Total RNAs were  
517 prepared from *S. aureus* growth in RPMI medium. Relative expression levels (fold  
518 change,  $\Delta$ ccpE vs wild-type Newman) of interest genes were calculated with the  
519 relative quantification method ( $\Delta\Delta$ CT) as described in Experimental Procedures. N/A,  
520 Not Applicable.

521

522

523

524

525

526

527

528

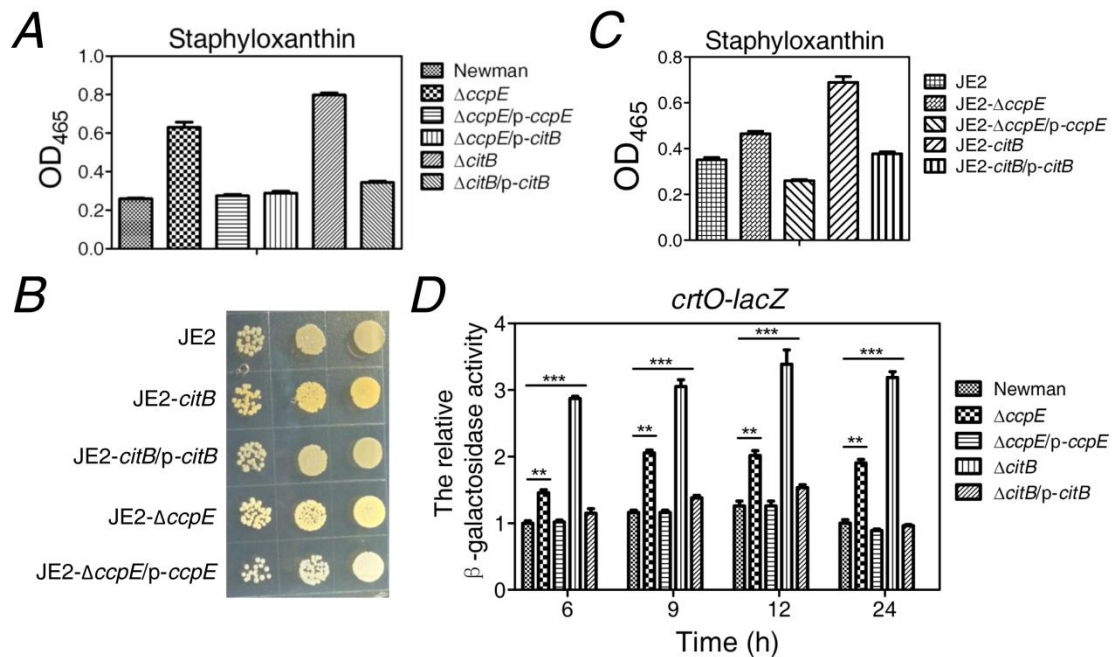

529

530 **Fig. S1.** Staphyloxanthin production of *S. aureus* and the promoter activity of

531 *crtOPQM*N operon. (A) Staphyloxanthin production of *S. aureus* wild-type Newman

532 strain and its derivatives, as indicated. (B) Pigmentation of *S. aureus* JE2 strain and its

533 derivatives grown on TSA plates at 37 °C for 24 h is shown. (C) Staphyloxanthin

534 production by *S. aureus* wild-type JE2 strain and its derivatives. (D) The absence of

535 either *ccpE* or *citB* results in an increase of *crtO-lacZ* activity when bacteria are

536 grown in TSB medium without glucose. Values are relative to wild-type Newman

537 bacteria that were grown for 6 hours (set to 1). \*\*  $p < 0.01$ , \*\*\*  $p < 0.001$  (*t*-test). In all

538 panels, Newman,  $\Delta ccpE$ ,  $\Delta citB$ , JE2, JE2- $\Delta ccpE$ , and JE2- $\Delta citB$  harbor plasmid

539 pYJ335, respectively. Bacteria were grown on a TSA plate at 37 °C for 24 h and the

540 staphyloxanthin production of different *S. aureus* strains was measured by methanol

541 extraction. Relative optical density units at 465 nm were normalized to the optical

542 density (OD<sub>600</sub>) of the washed bacterial suspensions. Results are means  $\pm$  standard

543 error of the means (errors bars) reflecting experiments conducted in triplicate.

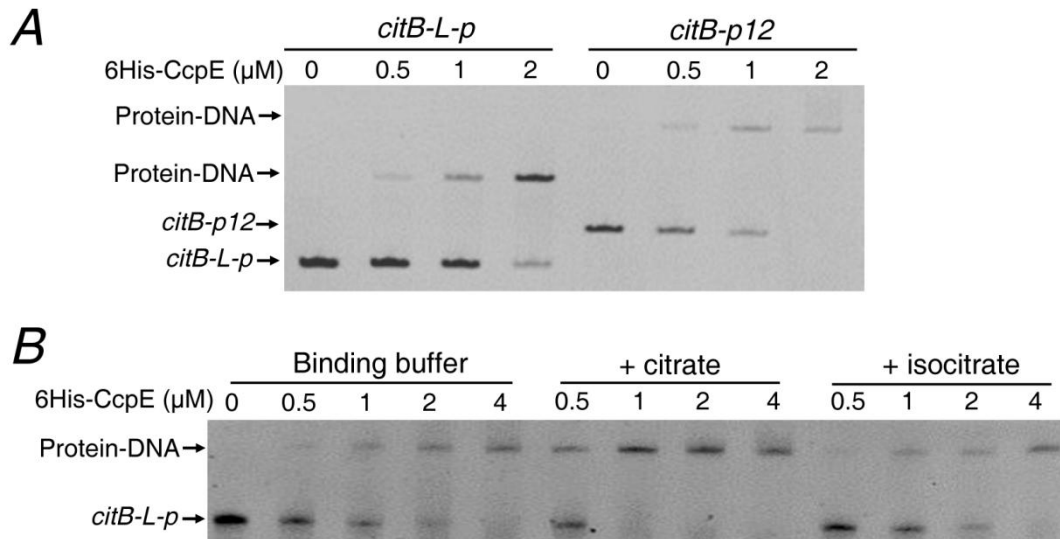

544

545 **Fig. S2.** (A) EMSA showing that *citB-p12* DNA fragment has higher affinity for  
 546 6His-CcpE than *citB-L-p* in the absence of citrate. *citB-p12*, a DNA fragment (from  
 547 -321 to +66 of the start codon of *citB*) covering both the CcpE-protected regions I  
 548 and II. *citB-L-p*, a DNA fragment (from -194 to +88 of the start codon of *citB*)  
 549 covering the CcpE-protected region I but not II. (B) EMSA showing that sodium  
 550 citrate (10 mM) but not sodium isocitrate (10 mM) enhances the binding of  
 551 6His-CcpE to a DNA fragment (*citB-L-p*) of *citB* promoter.

552

553

554

555

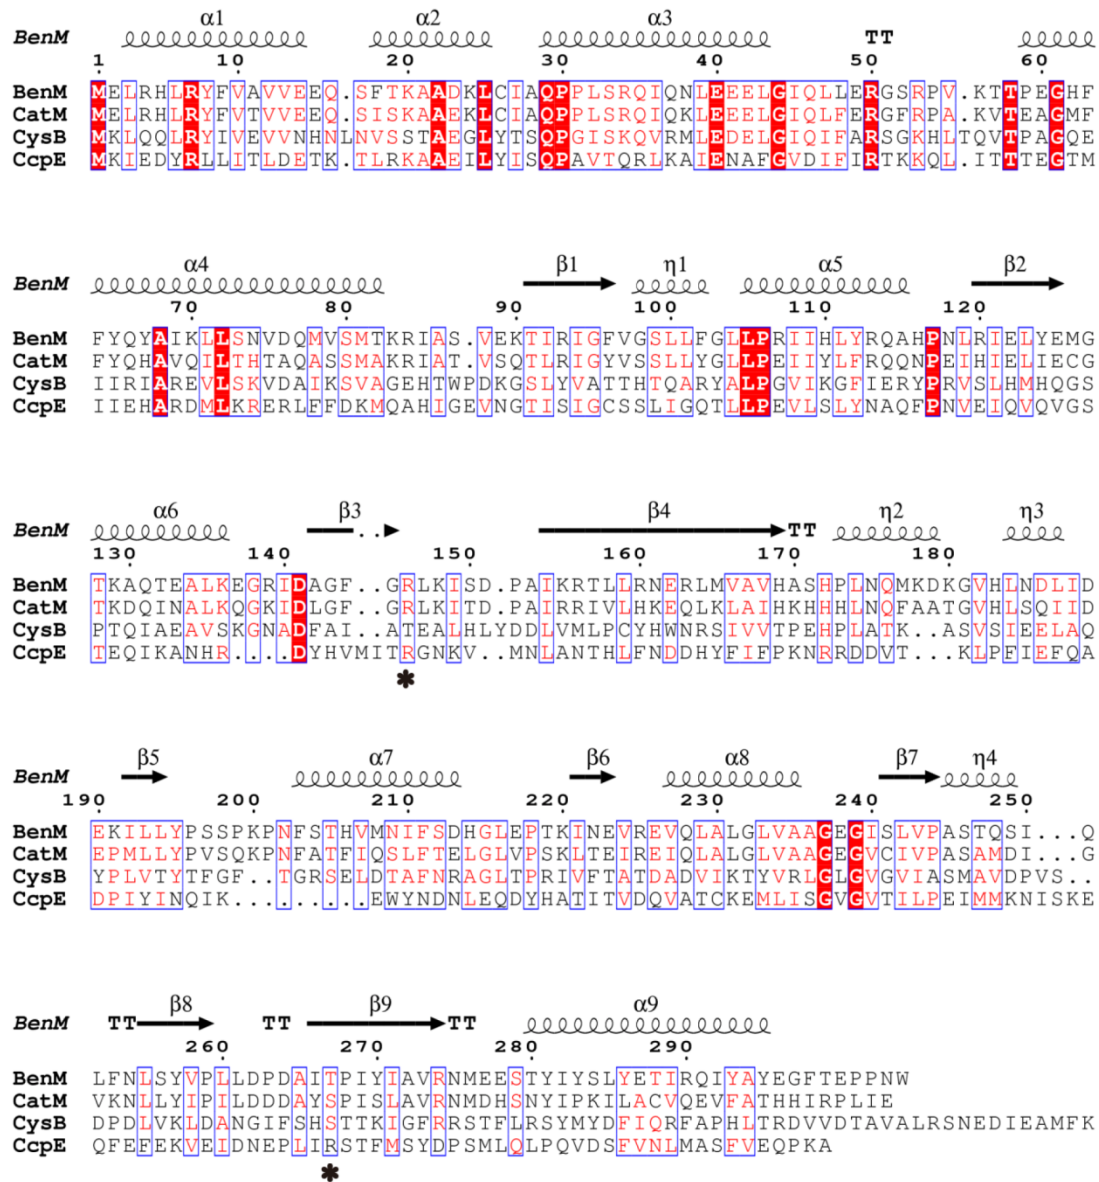

556

557 **Fig. S3.** Sequence alignment and secondary structure assignment of LTTRs.

558 Structure-based sequence alignment of CcpE to BenM (PDB code 2F6G), CatM (PDB

559 code 2F7B), and CysB (PDB code 1AL3) was performed in EXPRESSO (3DCoffee)

560 (34), and CcpE<sub>F</sub> was manually aligned according to the crystal structure. Figure was

561 drawn with ESPript (35). The red background is intended to highlight identical

562 residues; residues in red font are highly homologous. An asterisk is used below to

563 mark two arginine residues (Arg145 and Arg256) located in the putative

564 inducer-binding cavity (IBC) of CcpE. Secondary structure elements presented in the

565 full-length BenM structure (PDB code 3K1N) are shown on top of the sequence

566 alignment, with residue numbers depicted at top of the alignment following BenM.

567

568

569

570

571

572

573

574

575

576

577

578

579

580

581

582

583

584

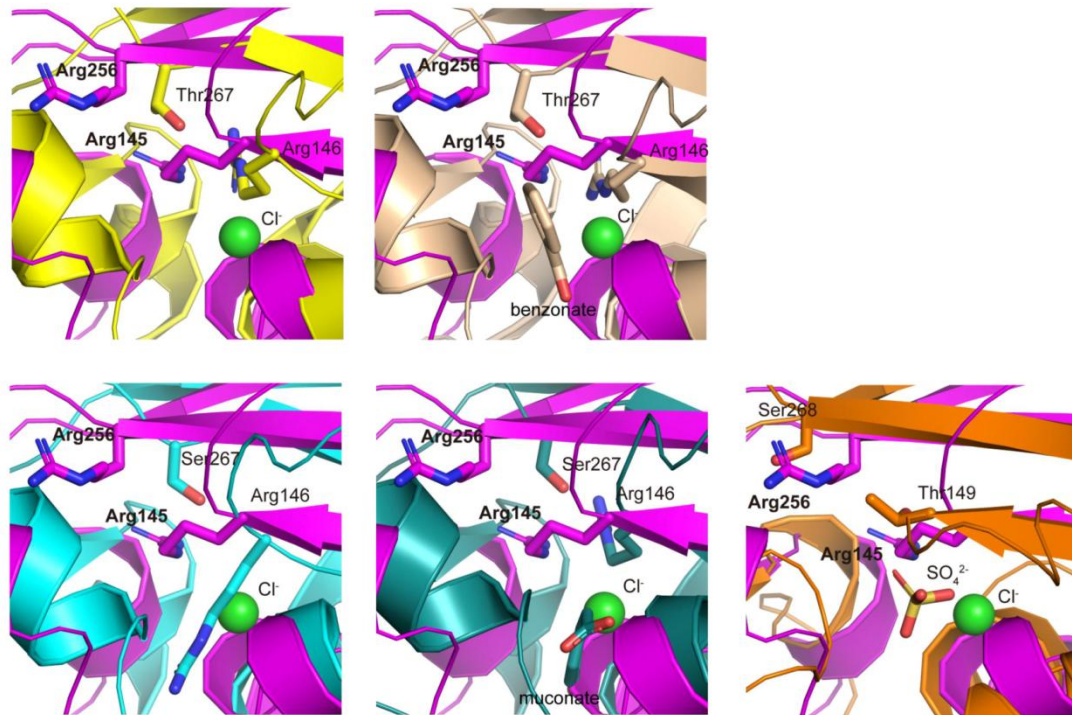

585

586 **Fig. S4.** Close view and comparison of the putative inducer-binding cavity (IBC) of  
 587 LysR transcriptional regulators. The crystal structures of BenM (PDB code 2F6G in  
 588 yellow), BenM/benzonate (PDB code 2F78 in wheat), CatM (PDB code 2F7B in  
 589 cyan), CatM/muconate (PDB code 2F7C in deepteal), and CysB (PDB code 1AL3 in  
 590 orange) were individually aligned to the structure of CcpE (PDB code 4QBA in  
 591 magenta) in PyMoL, respectively. The same view was extracted and presented in  
 592 order to show the putative inducer-binding cavity for each LysR protein. The two  
 593 residues Arg145 and Arg256 are shown as sticks in CcpE, and the sequence and  
 594 secondary structure correspondence residues in other LysR members are labeled. The  
 595 inducers (benzonate or muconate) are shown and colored in the same mode to protein.

596

597

598

599



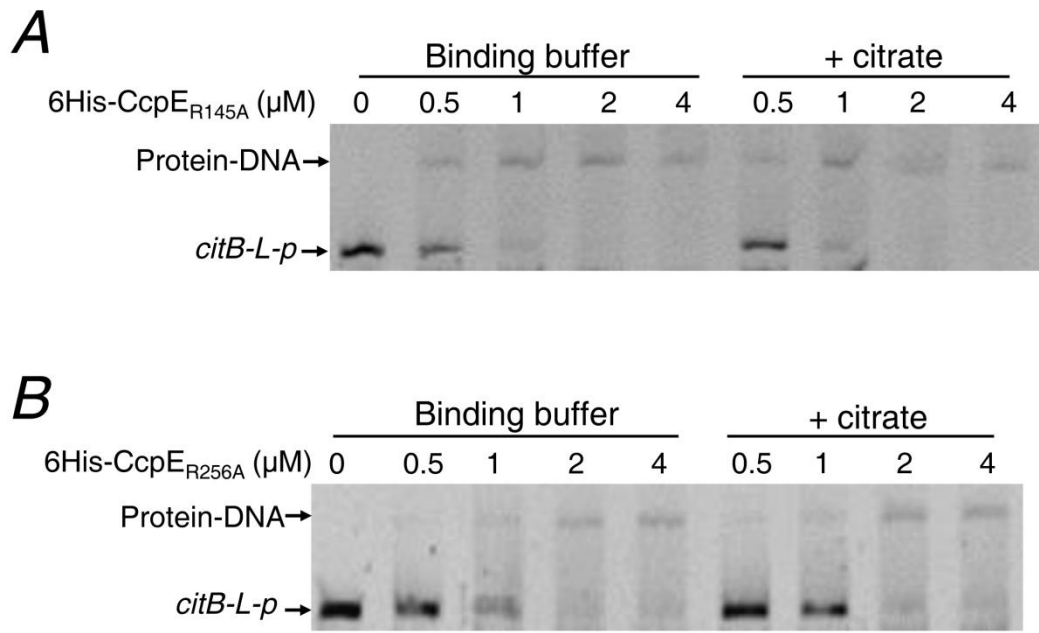

600

601 **Fig. S5.** EMSA showing that sodium citrate (10 mM) fails to enhance the binding of

602 either 6His-CcpE<sub>R145A</sub> (**A**) or 6His-CcpE<sub>R256A</sub> (**B**) to a promoter DNA fragment of *citB*.

603 *citB-L-p*, a 282 bp DNA fragment covering the CcpE-protected region I of the

604 promoter region of *citB* (from -194 to +88 of the start codon).

605

606

607

608

609

610

611

612

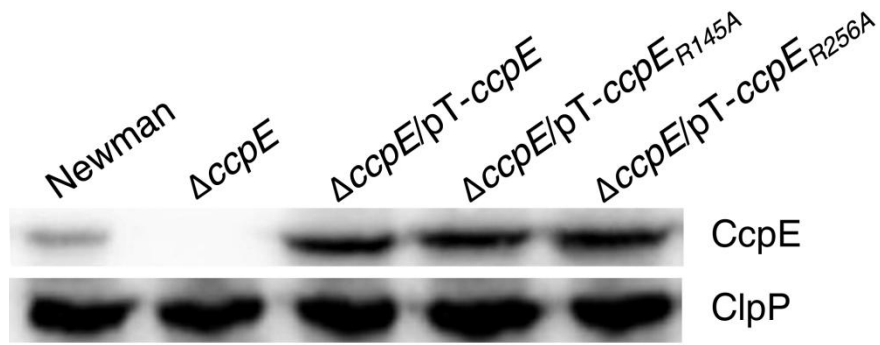

613

614 **Fig. S6.** Western blot analysis showing that missense mutations in *ccpE* do not affect  
 615 protein levels of CcpE. Immunoblots for ClpP served as loading control. Wild-type  
 616 Newman and  $\Delta ccpE$  strain harbor the control plasmid pYJ335-Tc, respectively. Cell  
 617 lysates were used as described in the experimental procedures section.

618

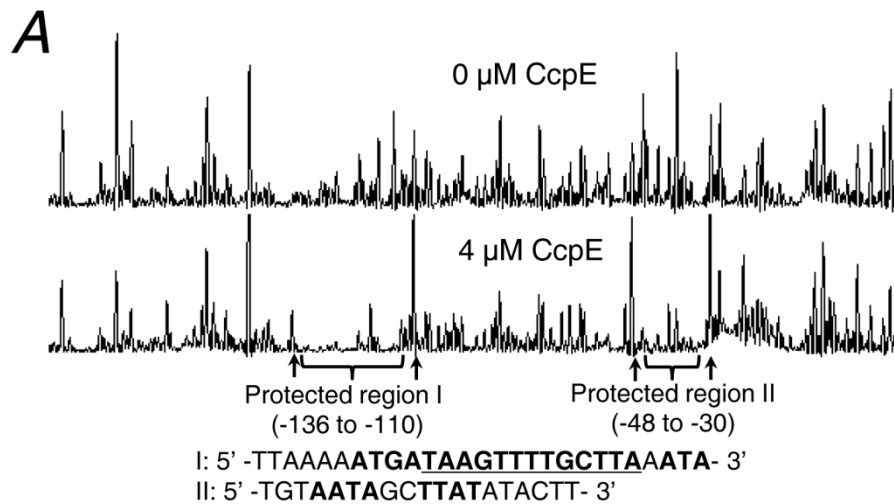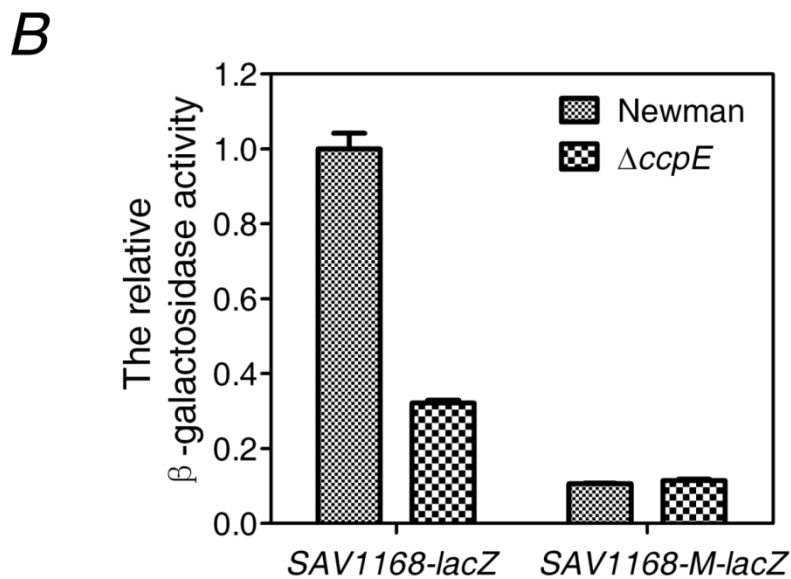

619

620 **Fig. S7.** (A) Electropherograms show the protection pattern of the *NWMN\_1077*  
 621 promoter after digestion with DNase I following incubation in the absence or the  
 622 presence of 6His-CcpE (4  $\mu$ M). Protection is seen throughout the region from -136 to  
 623 -30 and there are two apparent CcpE-protected regions (I and II) in the promoter of  
 624 *NWMN\_1077*. The DNA sequences of the two CcpE-protected regions are illustrated.  
 625 Arrows indicate DNase I-hypersensitive sites (-137, -106, -50, and -28) at the edges of  
 626 the protected regions. Protected regions I: the potential LTR box is underlined and  
 627 similar DNA sequences between the protected regions I of *SAV1168* and *citB* are in  
 628 bold. Protected regions II: the two box II-like sequences (AATA and TTAT) are in

629 bold letters. **(B)** Effects of mutations on the protected region I on the promoter  
630 activity of *SAV1168*. *SAV1168-lacZ*, a promoter-*lacZ* reporter fusion with *SAV1168*  
631 promoter DNA (from -511 to +158 of the start codon of *SAV1168*) was cloned into  
632 pCL-*lacZ* as described in the experimental procedures section.  
633 ATGATAAGTTTTGCTTAAATA of *SAV1168* promoter was mutated to  
634 ATGATAAGTTTTATGGCCATA, yielding *SAV1168-M-lacZ*. Bacteria were grown in  
635 TSB at 37 °C with shaking, 250 rpm of aeration, and sampled at 6 h. Values are  
636 relative to wild-type Newman (set to 1). Results represent means ± SEM and data are  
637 representative of three independent experiments.

638

639

640

641

642

643

644

645

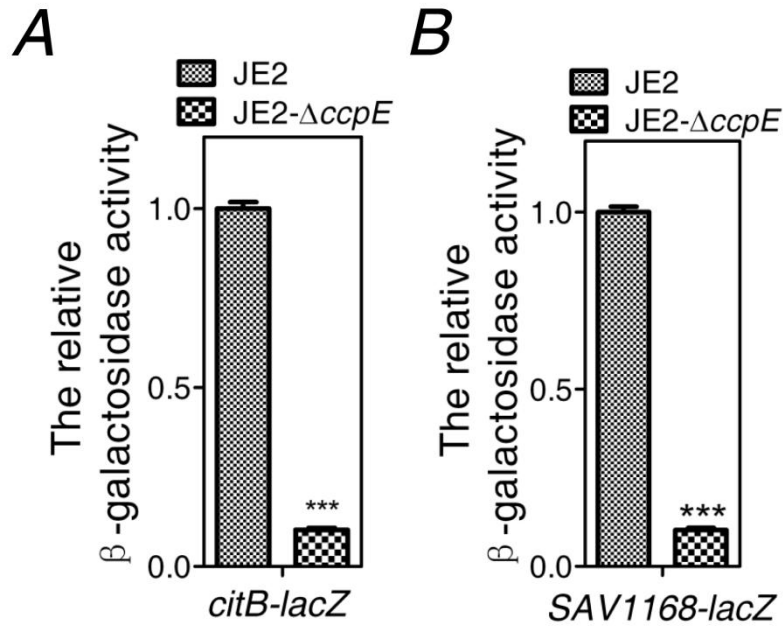

646

647 **Fig. S8.** The expression of either *citB-lacZ* (A) and *SAV1168-lacZ* (B) in JE2 strain

648 and JE2- $\Delta ccpE$  strain. *S. aureus* was grown in TSB at 37 °C with shaking, 250 rpm of

649 aeration, and sampled at 6 h. Values are relative to wild-type JE2 strain (set to 1),

650 respectively. Results represent means  $\pm$  SEM and data are representative of three

651 independent experiments. \*\*\*  $p < 0.001$  (*t*-test).

652

653

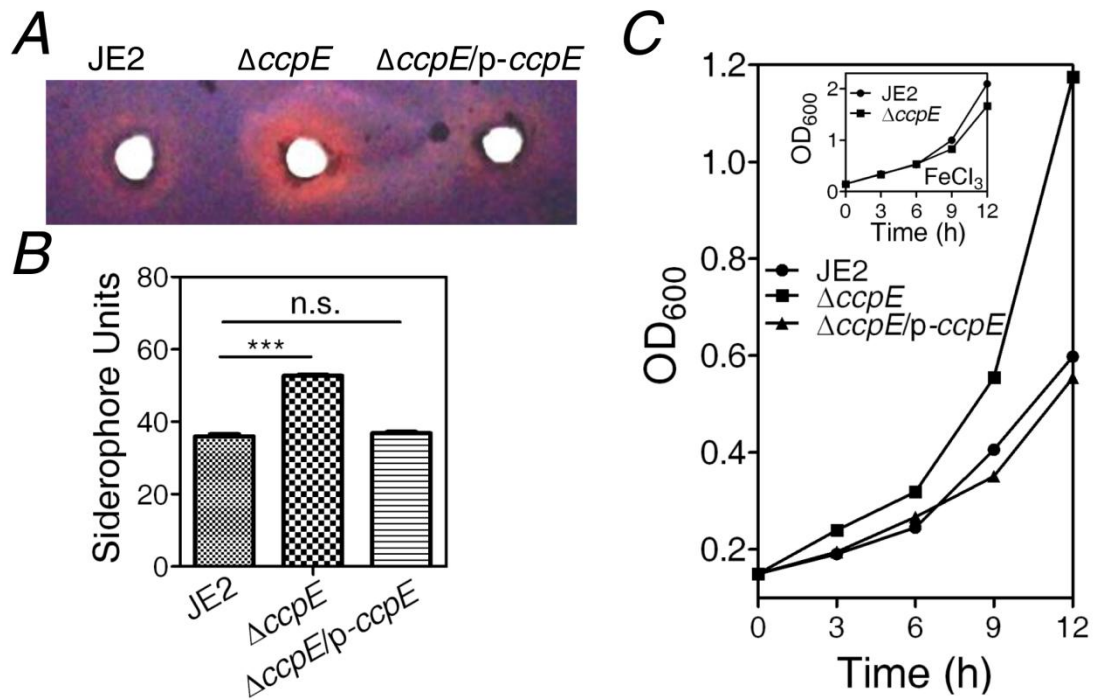

654

655 **Fig. S9.** Deletion of *ccpE* results in improved ability of the *S. aureus* JE2 strain to  
 656 acquire iron. In all panels, wild-type JE2 and its isogenic *ccpE* deletion mutant  
 657 (JE2- $\Delta ccpE$ , showing as  $\Delta ccpE$  in this Figure) harbor plasmid pYJ335, respectively.

658 (A) Assessment of the siderophore production using a chrome azurol S agar diffusion  
 659 (CASAD) assay as described in the Experimental procedure. The orange halos formed  
 660 around the wells correspond to the iron-chelating activity of the siderophores. (B)  
 661 Siderophore levels in spent culture supernatants of wild-type JE2 strain and its  
 662 derivatives, as indicated. Siderophore units were calculated as described in  
 663 Experimental procedures. Values represent means  $\pm$  SEM. (C) Representative growth  
 664 curves for *S. aureus* grown in iron-limited and in iron-sufficient medium (inserts).  
 665 Data are representative of three independent experiments.

666

667

668

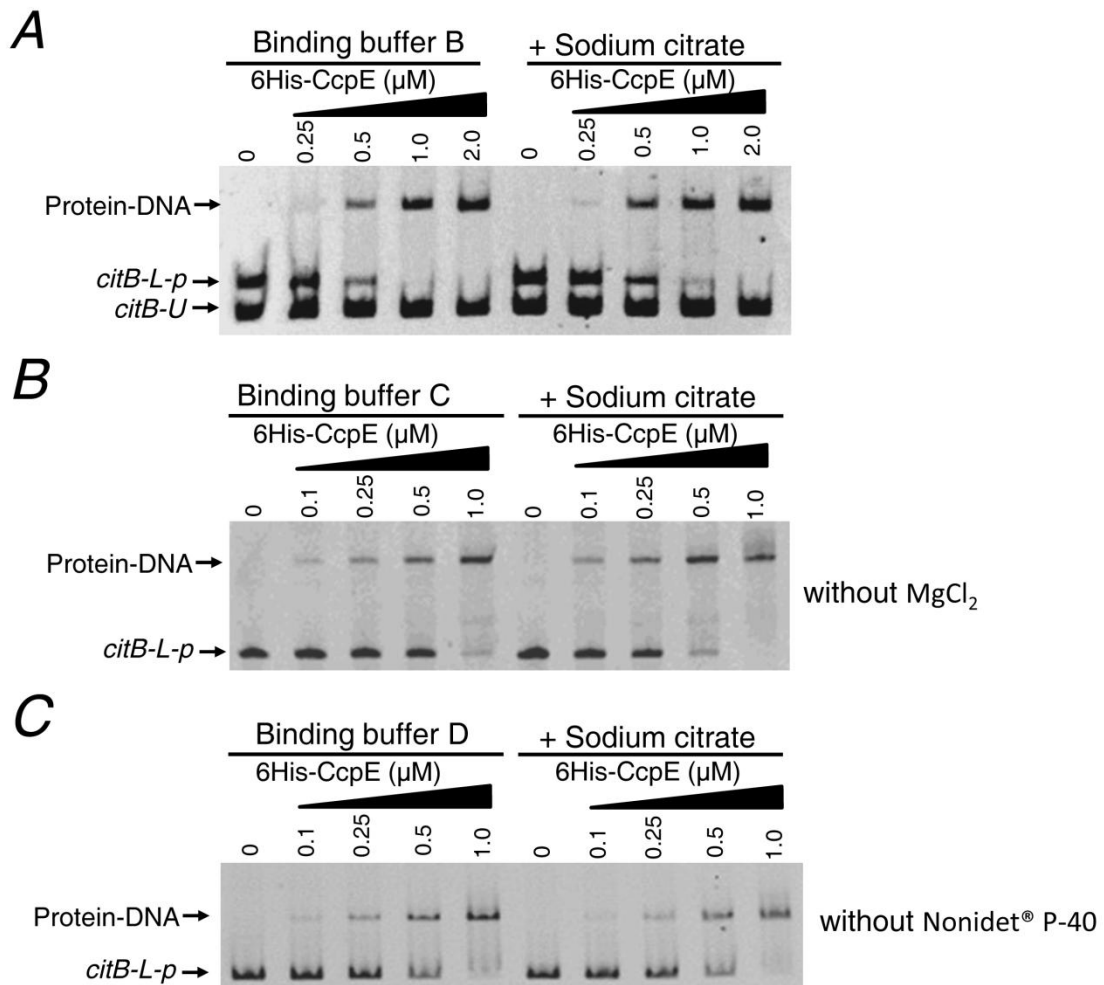

669

670 **Fig. S10.** (A) EMSA showing that sodium citrate (10 mM) fails to increase the  
 671 DNA-binding ability of 6His-CcpE to a promoter DNA fragment of *citB* (*citB-L-p*) in  
 672 binding buffer B [10mM Tris-HCl, pH 7.5; 50 mM NaCl, 1mM EDTA, 1mM DTT,  
 673 and 5% Glycerol] (36). (B) EMSA showing that sodium citrate (10 mM) is able to  
 674 increase the DNA-binding ability of 6His-CcpE in binding buffer C [20mM Tris-HCl,  
 675 pH 7.4; 50 mM KCl, 1 mM EDTA, 5% Nonidet® P-40, and 5% Glycerol] (Mg<sup>2+</sup> was  
 676 eliminated from binding buffer A described in the Experimental procedure, termed  
 677 binding buffer C). (C) EMSA showing that sodium citrate (10 mM) fails to increase  
 678 the DNA-binding ability of 6His-CcpE in binding buffer D [20mM Tris-HCl, pH 7.4;  
 679 50 mM KCl, 20 mM MgCl<sub>2</sub>, 1 mM EDTA, and 5% Glycerol] (Nonidet® P-40 was

680 eliminated from binding buffer A, termed binding buffer D). *citB-L-p*, a 282 bp DNA  
681 fragment covering the CcpE-protected region I of the promoter region of *citB* (from  
682 -194 to +88 of the start codon). *citB-U*, a DNA fragment of *citB* promoter DNA (from  
683 -128 to +88 of the start codon of *citB*) containing no CcpE-protected region.

684

685

686

687

688

689

690

691

692



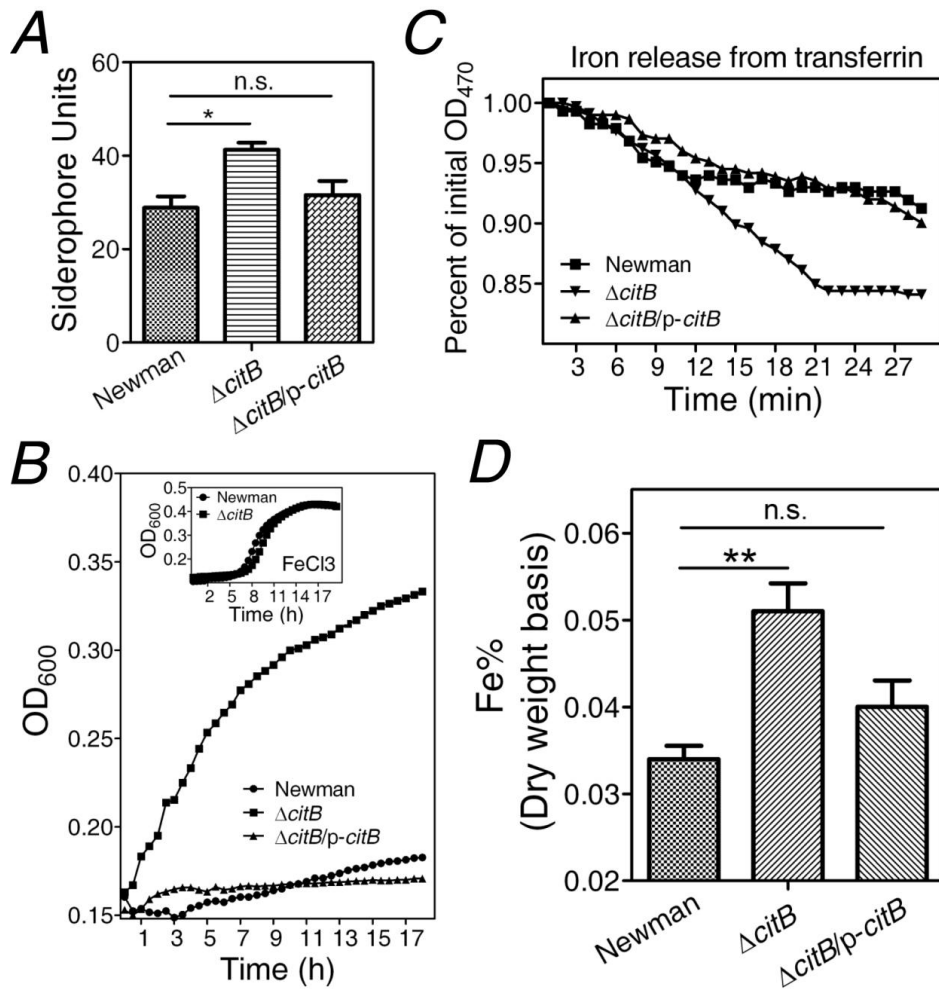

693

694 **Fig. S11.** Deletion of *citB* results in improved ability of *S. aureus* to acquire iron. In

695 all panels, wild-type Newman and  $\Delta citB$  strain harbor plasmid pYJ335, respectively.

696 (A) Siderophore levels in spent culture supernatants of Newman strain and its

697 derivatives, as indicated. Siderophore units were calculated as described in

698 Experimental procedures. (B) Representative growth curves for *S. aureus* grown in

699 iron-limited and in iron-sufficient medium (inserts). Data are representative of three

700 independent experiments. (C) Iron release from transferrin mediated by various spent

701 medium from wild-type Newman strain and its derivatives, as indicated. A decrease in

702 optical density signifies a release of iron from transferrin. Data are representative of

703 three independent experiments. (D) Determination of intracellular iron content of

704 wild-type Newman strain and its derivatives, as indicated. Bacteria were grown in  
705 RPMI medium for 24 h with shaking, 250 rpm of aeration. After that, cells were  
706 collected, prepared for and run on atomic absorption spectroscopy. Results for iron  
707 content as a percentage of the dry weight. Values represent means  $\pm$ SEM and data are  
708 representative of three independent experiments. The statistical difference was  
709 determined by unpaired two-tailed Student's t-test and asterisks denote statistical  
710 significance: \* $p < 0.05$ ; \*\* $p < 0.01$ ; n.s., not significant.

711

712

713

714

715



719 *monocytogenes* (CcpCLm), *Streptococcus pseudoporcinus* (WP\_007892350), and  
720 *Streptococcus porcinus* (WP\_003083567). The different sequences were aligned using  
721 the ClustalW program. The two conserved arginine residues (Arg256 and Arg145) are  
722 in red. Stars indicate identical amino acids, double dots (: ) indicate conserved amino  
723 acids, and single dots (.) indicate that residues are more or less similar.

724

725

## 726 **References**

- 727 1. Bae T & Schneewind O (2006) Allelic replacement in *Staphylococcus aureus* with inducible  
728 counter-selection. *Plasmid* 55(1):58-63.
- 729 2. Sun F, *et al.* (2012) Protein cysteine phosphorylation of SarA/MgrA family transcriptional  
730 regulators mediates bacterial virulence and antibiotic resistance. *Proceedings of the National  
731 Academy of Sciences of the United States of America* 109(38):15461-15466.
- 732 3. Liu X, *et al.* (2013) Oxidation-sensing regulator AbfR regulates oxidative stress responses,  
733 bacterial aggregation, and biofilm formation in *Staphylococcus epidermidis*. *The Journal of  
734 biological chemistry* 288(6):3739-3752.
- 735 4. Trieu-Cuot P, Carlier C, Poyart-Salmeron C, & Courvalin P (1991) Shuttle vectors containing a  
736 multiple cloning site and a lacZ alpha gene for conjugal transfer of DNA from *Escherichia coli*  
737 to gram-positive bacteria. *Gene* 102(1):99-104.
- 738 5. Lan L, Cheng A, Dunman PM, Missiakas D, & He C (2010) Golden pigment production and  
739 virulence gene expression are affected by metabolisms in *Staphylococcus aureus*. *Journal of  
740 bacteriology* 192(12):3068-3077.
- 741 6. Ji Y, Marra A, Rosenberg M, & Woodnutt G (1999) Regulated antisense RNA eliminates  
742 alpha-toxin virulence in *Staphylococcus aureus* infection. *Journal of bacteriology*  
743 181(21):6585-6590.
- 744 7. Khan SA & Novick RP (1983) Complete nucleotide sequence of pT181, a  
745 tetracycline-resistance plasmid from *Staphylococcus aureus*. *Plasmid* 10(3):251-259.
- 746 8. Sun F, *et al.* (2010) In the *Staphylococcus aureus* two-component system sae, the response  
747 regulator SaeR binds to a direct repeat sequence and DNA binding requires phosphorylation  
748 by the sensor kinase SaeS. *Journal of bacteriology* 192(8):2111-2127.
- 749 9. Deng X, *et al.* (2012) Expression of multidrug resistance efflux pump gene norA is iron  
750 responsive in *Staphylococcus aureus*. *Journal of bacteriology* 194(7):1753-1762.
- 751 10. Chen B, *et al.* (2012) Development of cell-active N6-methyladenosine RNA demethylase FTO  
752 inhibitor. *Journal of the American Chemical Society* 134(43):17963-17971.
- 753 11. Zianni M, Tessanne K, Merighi M, Laguna R, & Tabita FR (2006) Identification of the DNA  
754 bases of a DNase I footprint by the use of dye primer sequencing on an automated capillary  
755 DNA analysis instrument. *Journal of biomolecular techniques : JBT* 17(2):103-113.

- 756 12. Cao Q, *et al.* (2014) A Novel Signal Transduction Pathway that Modulates rhl Quorum Sensing  
757 and Bacterial Virulence in *Pseudomonas aeruginosa*. *PLoS pathogens* 10(8):e1004340.
- 758 13. Vilhelmsson O & Miller KJ (2002) Humectant permeability influences growth and compatible  
759 solute uptake by *Staphylococcus aureus* subjected to osmotic stress. *Journal of food*  
760 *protection* 65(6):1008-1015.
- 761 14. Thammavongsa V, Kern JW, Missiakas DM, & Schneewind O (2009) *Staphylococcus aureus*  
762 synthesizes adenosine to escape host immune responses. *The Journal of experimental*  
763 *medicine* 206(11):2417-2427.
- 764 15. Shin SH, Lim Y, Lee SE, Yang NW, & Rhee JH (2001) CAS agar diffusion assay for the  
765 measurement of siderophores in biological fluids. *Journal of microbiological methods*  
766 44(1):89-95.
- 767 16. Morrissey JA, Cockayne A, Hill PJ, & Williams P (2000) Molecular cloning and analysis of a  
768 putative siderophore ABC transporter from *Staphylococcus aureus*. *Infection and immunity*  
769 68(11):6281-6288.
- 770 17. Friedman DB, *et al.* (2006) *Staphylococcus aureus* redirects central metabolism to increase  
771 iron availability. *PLoS pathogens* 2(8):e87.
- 772 18. Irizarry RA, *et al.* (2003) Exploration, normalization, and summaries of high density  
773 oligonucleotide array probe level data. *Biostatistics* 4(2):249-264.
- 774 19. Tusher VG, Tibshirani R, & Chu G (2001) Significance analysis of microarrays applied to the  
775 ionizing radiation response. *Proceedings of the National Academy of Sciences of the United*  
776 *States of America* 98(9):5116-5121.
- 777 20. Li D, *et al.* (2005) Induction of fibronectin adhesins in quinolone-resistant *Staphylococcus*  
778 *aureus* by subinhibitory levels of ciprofloxacin or by sigma B transcription factor activity is  
779 mediated by two separate pathways. *Antimicrobial agents and chemotherapy* 49(3):916-924.
- 780 21. Renzoni A, *et al.* (2004) Modulation of fibronectin adhesins and other virulence factors in a  
781 teicoplanin-resistant derivative of methicillin-resistant *Staphylococcus aureus*. *Antimicrobial*  
782 *agents and chemotherapy* 48(8):2958-2965.
- 783 22. Vaudaux P, *et al.* (2002) Increased expression of clumping factor and fibronectin-binding  
784 proteins by hemB mutants of *Staphylococcus aureus* expressing small colony variant  
785 phenotypes. *Infection and immunity* 70(10):5428-5437.
- 786 23. Lan L, *et al.* (2004) Monitoring of gene expression profiles and isolation of candidate genes  
787 involved in pollination and fertilization in rice (*Oryza sativa* L.) with a 10K cDNA microarray.  
788 *Plant molecular biology* 54(4):471-487.
- 789 24. Livak KJ & Schmittgen TD (2001) Analysis of relative gene expression data using real-time  
790 quantitative PCR and the 2<sup>-</sup>(Delta Delta C(T)) Method. *Methods* 25(4):402-408.
- 791 25. Doublie S (1997) Preparation of selenomethionyl proteins for phase determination. *Methods*  
792 *in enzymology* 276:523-530.
- 793 26. Otwinowski Z & Minor W (1997) Processing of X-ray diffraction data collected in oscillation  
794 mode. *Method Enzymol* 276:307-326.
- 795 27. Collaborative Computational Project N (1994) The CCP4 suite: programs for protein  
796 crystallography. *Acta crystallographica. Section D, Biological crystallography* 50(Pt  
797 5):760-763.
- 798 28. Sheldrick GM (2010) Experimental phasing with SHELXC/D/E: combining chain tracing with  
799 density modification. *Acta crystallographica. Section D, Biological crystallography* 66(Pt

800 4):479-485.

801 29. Emsley P & Cowtan K (2004) Coot: model-building tools for molecular graphics. *Acta*  
802 *crystallographica. Section D, Biological crystallography* 60(Pt 12 Pt 1):2126-2132.

803 30. Murshudov GN, Vagin AA, & Dodson EJ (1997) Refinement of macromolecular structures by  
804 the maximum-likelihood method. *Acta crystallographica. Section D, Biological crystallography*  
805 53(Pt 3):240-255.

806 31. Duthie ES & Lorenz LL (1952) Staphylococcal coagulase; mode of action and antigenicity.  
807 *Journal of general microbiology* 6(1-2):95-107.

808 32. Fey PD, *et al.* (2013) A genetic resource for rapid and comprehensive phenotype screening of  
809 nonessential *Staphylococcus aureus* genes. *mBio* 4(1):e00537-00512.

810 33. Kreiswirth BN, *et al.* (1983) The toxic shock syndrome exotoxin structural gene is not  
811 detectably transmitted by a prophage. *Nature* 305(5936):709-712.

812 34. Notredame C, Higgins DG, & Heringa J (2000) T-Coffee: A novel method for fast and accurate  
813 multiple sequence alignment. *Journal of molecular biology* 302(1):205-217.

814 35. Gouet P, Robert X, & Courcelle E (2003) ESPript/ENDscript: Extracting and rendering  
815 sequence and 3D information from atomic structures of proteins. *Nucleic acids research*  
816 31(13):3320-3323.

817 36. Hartmann T, *et al.* (2013) Catabolite control protein E (CcpE) is a LysR-type transcriptional  
818 regulator of tricarboxylic acid cycle activity in *Staphylococcus aureus*. *The Journal of*  
819 *biological chemistry* 288(50):36116-36128.

820

821
